# Supplementary material
Source: publisher figshare collection journal article supplement (https://sage.figshare.com/ndownloader/files/31569754)
Supplement: Supplementary file 1 [file 31569754]

## Sheet: DHS FEL FECAL STUDY 06_16-09_17
LOGDATE	ACCSUBTYPE_Text	COLLSTATE	COLLCOUNTY	COLLCITY	PRIMARYEXTID	TAXONCOMMONPROPER	AGE	AGEUNITS	SEX	ANY PARASITICIDES USED	PRESENCE OF ECTOPARASITES	SPECIMEN_TYPE	ORDNO	TESTCODE	ANALYTE	FINAL	CONCLUSION
2016-06-17 10:57:05	DHS Projects (DeBess)	OR	MULTNOMAH	PORTLAND	Ellingsen	Domestic Longhaired Cat	Not Provided	Not Provided	Not Provided	Not Provided	Not Provided	Feces	16V14553-01.0001	6005	BAERMAN	Lungworm larvae present	Lungworm larvae present Aelurostrongylus
2016-06-17 10:57:05	DHS Projects (DeBess)	OR	MULTNOMAH	PORTLAND	Ellingsen	Domestic Longhaired Cat	Not Provided	Not Provided	Not Provided	Not Provided	Not Provided	Feces	16V14553-01.0001	10325	Crypto	Cryptosporidia present - Sm #
2016-06-17 10:57:05	DHS Projects (DeBess)	OR	MULTNOMAH	PORTLAND	Ellingsen	Domestic Longhaired Cat	Not Provided	Not Provided	Not Provided	Not Provided	Not Provided	Feces	16V14553-01.0001	10787	Fecal Sugar Centrifuge	Toxocara cati	Toxocara cati
2016-06-17 10:57:05	DHS Projects (DeBess)	OR	MULTNOMAH	PORTLAND	Ellingsen	Domestic Longhaired Cat	Not Provided	Not Provided	Not Provided	Not Provided	Not Provided	Feces	16V14553-01.0001	10788	Giardia - FA	Negative
2016-06-17 10:57:05	DHS Projects (DeBess)	OR	MULTNOMAH	PORTLAND	Cody	Domestic Shorthaired Cat	5	Y	Male	Not Provided	Not Provided	Feces	16V14553-01.0002	6005	BAERMAN	No Lungworm Seen	No Lungworm Seen
2016-06-17 10:57:05	DHS Projects (DeBess)	OR	MULTNOMAH	PORTLAND	Cody	Domestic Shorthaired Cat	5	Y	Male	Not Provided	Not Provided	Feces	16V14553-01.0002	10325	Crypto	No Cryptosporidia detected
2016-06-17 10:57:05	DHS Projects (DeBess)	OR	MULTNOMAH	PORTLAND	Cody	Domestic Shorthaired Cat	5	Y	Male	Not Provided	Not Provided	Feces	16V14553-01.0002	10787	Fecal Sugar Centrifuge	No oocysts or eggs detected	No oocysts or eggs detected
2016-06-17 10:57:05	DHS Projects (DeBess)	OR	MULTNOMAH	PORTLAND	Cody	Domestic Shorthaired Cat	5	Y	Male	Not Provided	Not Provided	Feces	16V14553-01.0002	10788	Giardia - FA	Negative
2016-06-17 10:57:05	DHS Projects (DeBess)	OR	MULTNOMAH	PORTLAND	Ginger	Domestic Shorthaired Cat	3	Y	Female	Not Provided	Not Provided	Feces	16V14553-01.0003	6005	BAERMAN	Lungworm larvae present	No further identification available due to orientation or condition of larvae observed
2016-06-17 10:57:05	DHS Projects (DeBess)	OR	MULTNOMAH	PORTLAND	Ginger	Domestic Shorthaired Cat	3	Y	Female	Not Provided	Not Provided	Feces	16V14553-01.0003	10325	Crypto	No Cryptosporidia detected
2016-06-17 10:57:05	DHS Projects (DeBess)	OR	MULTNOMAH	PORTLAND	Ginger	Domestic Shorthaired Cat	3	Y	Female	Not Provided	Not Provided	Feces	16V14553-01.0003	10787	Fecal Sugar Centrifuge	Aelurostrongylus sp.	Aelurostrongylus sp.
2016-06-17 10:57:05	DHS Projects (DeBess)	OR	MULTNOMAH	PORTLAND	Ginger	Domestic Shorthaired Cat	3	Y	Female	Not Provided	Not Provided	Feces	16V14553-01.0003	10788	Giardia - FA	Negative
2016-06-17 10:57:05	DHS Projects (DeBess)	OR	MULTNOMAH	PORTLAND	ZhuZhu	Domestic Shorthaired Cat	5	Y	Female	Not Provided	Not Provided	Feces	16V14553-01.0004	6005	BAERMAN	No Lungworm Seen	No Lungworm Seen
2016-06-17 10:57:05	DHS Projects (DeBess)	OR	MULTNOMAH	PORTLAND	ZhuZhu	Domestic Shorthaired Cat	5	Y	Female	Not Provided	Not Provided	Feces	16V14553-01.0004	10325	Crypto	No Cryptosporidia detected
2016-06-17 10:57:05	DHS Projects (DeBess)	OR	MULTNOMAH	PORTLAND	ZhuZhu	Domestic Shorthaired Cat	5	Y	Female	Not Provided	Not Provided	Feces	16V14553-01.0004	10787	Fecal Sugar Centrifuge	No oocysts or eggs detected	No oocysts or eggs detected
2016-06-17 10:57:05	DHS Projects (DeBess)	OR	MULTNOMAH	PORTLAND	ZhuZhu	Domestic Shorthaired Cat	5	Y	Female	Not Provided	Not Provided	Feces	16V14553-01.0004	10788	Giardia - FA	Negative
2016-07-22 10:29:36	DHS Projects (DeBess)	OR	MULTNOMAH	PORTLAND	Polly	Domestic Shorthaired Cat	9	Y	Female	Not Provided	Not Provided	Feces	17V00984-01.0001	6005	BAERMAN	No Lungworm Seen	No Lungworm Seen
2016-07-22 10:29:36	DHS Projects (DeBess)	OR	MULTNOMAH	PORTLAND	Polly	Domestic Shorthaired Cat	9	Y	Female	Not Provided	Not Provided	Feces	17V00984-01.0001	10325	Crypto	Cryptosporidia present
2016-07-22 10:29:36	DHS Projects (DeBess)	OR	MULTNOMAH	PORTLAND	Polly	Domestic Shorthaired Cat	9	Y	Female	Not Provided	Not Provided	Feces	17V00984-01.0001	10787	Fecal Sugar Centrifuge	No oocysts or eggs detected	No oocysts or eggs detected
2016-07-22 10:29:36	DHS Projects (DeBess)	OR	MULTNOMAH	PORTLAND	Polly	Domestic Shorthaired Cat	9	Y	Female	Not Provided	Not Provided	Feces	17V00984-01.0001	10788	Giardia - FA	Negative
2016-07-22 10:29:36	DHS Projects (DeBess)	OR	MULTNOMAH	PORTLAND	Willie	Domestic Mediumhaired Cat	8	Y	Male	Not Provided	Not Provided	Feces	17V00984-01.0002	6005	BAERMAN	No Lungworm Seen	No Lungworm Seen
2016-07-22 10:29:36	DHS Projects (DeBess)	OR	MULTNOMAH	PORTLAND	Willie	Domestic Mediumhaired Cat	8	Y	Male	Not Provided	Not Provided	Feces	17V00984-01.0002	10325	Crypto	Cryptosporidia present
2016-07-22 10:29:36	DHS Projects (DeBess)	OR	MULTNOMAH	PORTLAND	Willie	Domestic Mediumhaired Cat	8	Y	Male	Not Provided	Not Provided	Feces	17V00984-01.0002	10787	Fecal Sugar Centrifuge	No oocysts or eggs detected	No oocysts or eggs detected
2016-07-22 10:29:36	DHS Projects (DeBess)	OR	MULTNOMAH	PORTLAND	Willie	Domestic Mediumhaired Cat	8	Y	Male	Not Provided	Not Provided	Feces	17V00984-01.0002	10788	Giardia - FA	Negative
2016-07-22 10:29:36	DHS Projects (DeBess)	OR	MULTNOMAH	PORTLAND	Lloyd	Domestic Shorthaired Cat	3	Y	Male	Not Provided	Not Provided	Feces	17V00984-01.0003	6005	BAERMAN	Lungworm larvae present	Lungworm larvae present Aelurostrongylus
2016-07-22 10:29:36	DHS Projects (DeBess)	OR	MULTNOMAH	PORTLAND	Lloyd	Domestic Shorthaired Cat	3	Y	Male	Not Provided	Not Provided	Feces	17V00984-01.0003	10325	Crypto	No Cryptosporidia detected
2016-07-22 10:29:36	DHS Projects (DeBess)	OR	MULTNOMAH	PORTLAND	Lloyd	Domestic Shorthaired Cat	3	Y	Male	Not Provided	Not Provided	Feces	17V00984-01.0003	10787	Fecal Sugar Centrifuge	No oocysts or eggs detected	No oocysts or eggs detected
2016-07-22 10:29:36	DHS Projects (DeBess)	OR	MULTNOMAH	PORTLAND	Lloyd	Domestic Shorthaired Cat	3	Y	Male	Not Provided	Not Provided	Feces	17V00984-01.0003	10788	Giardia - FA	Positive
2016-07-22 10:29:36	DHS Projects (DeBess)	OR	MULTNOMAH	PORTLAND	Jack	Domestic Shorthaired Cat	12	Y	Male	Not Provided	Not Provided	Feces	17V00984-01.0004	6005	BAERMAN	Lungworm larvae present	Lungworm larvae present Aelurostrongylus
2016-07-22 10:29:36	DHS Projects (DeBess)	OR	MULTNOMAH	PORTLAND	Jack	Domestic Shorthaired Cat	12	Y	Male	Not Provided	Not Provided	Feces	17V00984-01.0004	10325	Crypto	No Cryptosporidia detected
2016-07-22 10:29:36	DHS Projects (DeBess)	OR	MULTNOMAH	PORTLAND	Jack	Domestic Shorthaired Cat	12	Y	Male	Not Provided	Not Provided	Feces	17V00984-01.0004	10787	Fecal Sugar Centrifuge	No oocysts or eggs detected	No oocysts or eggs detected
2016-07-22 10:29:36	DHS Projects (DeBess)	OR	MULTNOMAH	PORTLAND	Jack	Domestic Shorthaired Cat	12	Y	Male	Not Provided	Not Provided	Feces	17V00984-01.0004	10788	Giardia - FA	Positive
2016-07-22 10:29:36	DHS Projects (DeBess)	OR	MULTNOMAH	PORTLAND	Lily	Domestic Mediumhaired Cat	11	Y	Female	Not Provided	Not Provided	Feces	17V00984-01.0005	6005	BAERMAN	No Lungworm Seen	No Lungworm Seen
2016-07-22 10:29:36	DHS Projects (DeBess)	OR	MULTNOMAH	PORTLAND	Lily	Domestic Mediumhaired Cat	11	Y	Female	Not Provided	Not Provided	Feces	17V00984-01.0005	10325	Crypto	Cryptosporidia present
2016-07-22 10:29:36	DHS Projects (DeBess)	OR	MULTNOMAH	PORTLAND	Lily	Domestic Mediumhaired Cat	11	Y	Female	Not Provided	Not Provided	Feces	17V00984-01.0005	10787	Fecal Sugar Centrifuge	No oocysts or eggs detected	No oocysts or eggs detected
2016-07-22 10:29:36	DHS Projects (DeBess)	OR	MULTNOMAH	PORTLAND	Lily	Domestic Mediumhaired Cat	11	Y	Female	Not Provided	Not Provided	Feces	17V00984-01.0005	10788	Giardia - FA	Negative
2016-07-22 10:29:36	DHS Projects (DeBess)	OR	MULTNOMAH	PORTLAND	Chancho	Domestic Shorthaired Cat	6	Y	Male	Not Provided	Not Provided	Feces	17V00984-01.0006	6005	BAERMAN	No Lungworm Seen	No Lungworm Seen
2016-07-22 10:29:36	DHS Projects (DeBess)	OR	MULTNOMAH	PORTLAND	Chancho	Domestic Shorthaired Cat	6	Y	Male	Not Provided	Not Provided	Feces	17V00984-01.0006	10325	Crypto	No Cryptosporidia detected
2016-07-22 10:29:36	DHS Projects (DeBess)	OR	MULTNOMAH	PORTLAND	Chancho	Domestic Shorthaired Cat	6	Y	Male	Not Provided	Not Provided	Feces	17V00984-01.0006	10787	Fecal Sugar Centrifuge	No oocysts or eggs detected	No oocysts or eggs detected
2016-07-22 10:29:36	DHS Projects (DeBess)	OR	MULTNOMAH	PORTLAND	Chancho	Domestic Shorthaired Cat	6	Y	Male	Not Provided	Not Provided	Feces	17V00984-01.0006	10788	Giardia - FA	Negative
2016-09-21 11:15:12	DHS Projects (DeBess)	OR	DESCHUTES	BEND	Big Kitty	Domestic Longhaired Cat	8	Y	Female	Not Provided	Not Provided	Feces	17V03892-01.0001	6005	BAERMAN	*	* Not enough sample submitted to run all tests in panel.
2016-09-21 11:15:12	DHS Projects (DeBess)	OR	DESCHUTES	BEND	Big Kitty	Domestic Longhaired Cat	8	Y	Female	Not Provided	Not Provided	Feces	17V03892-01.0001	10325	Crypto	No Cryptosporidia detected
2016-09-21 11:15:12	DHS Projects (DeBess)	OR	DESCHUTES	BEND	Big Kitty	Domestic Longhaired Cat	8	Y	Female	Not Provided	Not Provided	Feces	17V03892-01.0001	10787	Fecal Sugar Centrifuge	No oocysts or eggs detected	No oocysts or eggs detected
2016-09-21 11:15:12	DHS Projects (DeBess)	OR	DESCHUTES	BEND	Big Kitty	Domestic Longhaired Cat	8	Y	Female	Not Provided	Not Provided	Feces	17V03892-01.0001	10788	Giardia - FA	Positive
2016-09-21 11:18:47	DHS Projects (DeBess)	OR	DESCHUTES	BEND	Tortuga	Domestic Longhaired Cat	8	Y	Male	No Topical Flea Meds	Not Provided	Feces	17V03893-01.0001	6005	BAERMAN	No Lungworm Seen	No Lungworm Seen
2016-09-21 11:18:47	DHS Projects (DeBess)	OR	DESCHUTES	BEND	Tortuga	Domestic Longhaired Cat	8	Y	Male	No Topical Flea Meds	Not Provided	Feces	17V03893-01.0001	10325	Crypto	No Cryptosporidia detected
2016-09-21 11:18:47	DHS Projects (DeBess)	OR	DESCHUTES	BEND	Tortuga	Domestic Longhaired Cat	8	Y	Male	No Topical Flea Meds	Not Provided	Feces	17V03893-01.0001	10787	Fecal Sugar Centrifuge	Taenia sp.	Taenia sp.
2016-09-21 11:18:47	DHS Projects (DeBess)	OR	DESCHUTES	BEND	Tortuga	Domestic Longhaired Cat	8	Y	Male	No Topical Flea Meds	Not Provided	Feces	17V03893-01.0001	10788	Giardia - FA	Positive
2016-09-26 09:44:12	DHS Projects (DeBess)	OR	DESCHUTES	BEND	Ted	Domestic Shorthaired Cat	6	Y	Male	Not Provided	Not Provided	Feces	17V04063-01.0001	6005	BAERMAN	No Lungworm Seen	No Lungworm Seen
2016-09-26 09:44:12	DHS Projects (DeBess)	OR	DESCHUTES	BEND	Ted	Domestic Shorthaired Cat	6	Y	Male	Not Provided	Not Provided	Feces	17V04063-01.0001	10325	Crypto	No Cryptosporidia detected
2016-09-26 09:44:12	DHS Projects (DeBess)	OR	DESCHUTES	BEND	Ted	Domestic Shorthaired Cat	6	Y	Male	Not Provided	Not Provided	Feces	17V04063-01.0001	10787	Fecal Sugar Centrifuge	Coccidia	Coccidia
2016-09-26 09:44:12	DHS Projects (DeBess)	OR	DESCHUTES	BEND	Ted	Domestic Shorthaired Cat	6	Y	Male	Not Provided	Not Provided	Feces	17V04063-01.0001	10788	Giardia - FA	Negative
2016-09-26 10:12:50	DHS Projects (DeBess)	OR	MULTNOMAH	PORTLAND	Sylvester	Domestic Shorthaired Cat	2	Y	Male	Not Provided	Not Provided	Feces	17V04065-01.0001	6005	BAERMAN	No Lungworm Seen	No Lungworm Seen
2016-09-26 10:12:50	DHS Projects (DeBess)	OR	MULTNOMAH	PORTLAND	Sylvester	Domestic Shorthaired Cat	2	Y	Male	Not Provided	Not Provided	Feces	17V04065-01.0001	10325	Crypto	No Cryptosporidia detected
2016-09-26 10:12:50	DHS Projects (DeBess)	OR	MULTNOMAH	PORTLAND	Sylvester	Domestic Shorthaired Cat	2	Y	Male	Not Provided	Not Provided	Feces	17V04065-01.0001	10787	Fecal Sugar Centrifuge	No oocysts or eggs detected	No oocysts or eggs detected
2016-09-26 10:12:50	DHS Projects (DeBess)	OR	MULTNOMAH	PORTLAND	Sylvester	Domestic Shorthaired Cat	2	Y	Male	Not Provided	Not Provided	Feces	17V04065-01.0001	10788	Giardia - FA	Negative
2016-10-25 11:51:40	DHS Projects (DeBess)	OR	MULTNOMAH	PORTLAND	Kuma	Not Provided	10	Y	Male	None	None	Feces	17V05431-01.0001	6005	BAERMAN	No Lungworm Seen	No Lungworm Seen
2016-10-25 11:51:40	DHS Projects (DeBess)	OR	MULTNOMAH	PORTLAND	Kuma	Not Provided	10	Y	Male	None	None	Feces	17V05431-01.0001	10325	Crypto	Cryptosporidia present
2016-10-25 11:51:40	DHS Projects (DeBess)	OR	MULTNOMAH	PORTLAND	Kuma	Not Provided	10	Y	Male	None	None	Feces	17V05431-01.0001	10787	Fecal Sugar Centrifuge	No oocysts or eggs detected	No oocysts or eggs detected
2016-10-25 11:51:40	DHS Projects (DeBess)	OR	MULTNOMAH	PORTLAND	Kuma	Not Provided	10	Y	Male	None	None	Feces	17V05431-01.0001	10788	Giardia - FA	Negative
2016-10-25 11:51:40	DHS Projects (DeBess)	OR	MULTNOMAH	PORTLAND	Lara	Not Provided	14	Y	Female	None	Yes	Feces	17V05431-02.0001	6005	BAERMAN	No Lungworm Seen	No Lungworm Seen
2016-10-25 11:51:40	DHS Projects (DeBess)	OR	MULTNOMAH	PORTLAND	Lara	Not Provided	14	Y	Female	None	Yes	Feces	17V05431-02.0001	10325	Crypto	No Cryptosporidia detected
2016-10-25 11:51:40	DHS Projects (DeBess)	OR	MULTNOMAH	PORTLAND	Lara	Not Provided	14	Y	Female	None	Yes	Feces	17V05431-02.0001	10787	Fecal Sugar Centrifuge	No oocysts or eggs detected	No oocysts or eggs detected
2016-10-25 11:51:40	DHS Projects (DeBess)	OR	MULTNOMAH	PORTLAND	Lara	Not Provided	14	Y	Female	None	Yes	Feces	17V05431-02.0001	10788	Giardia - FA	Negative
2016-10-25 11:51:40	DHS Projects (DeBess)	OR	MULTNOMAH	PORTLAND	Holly	Not Provided	5	Y	Female	Topical Flea Medication	None	Feces	17V05431-03.0001	6005	BAERMAN	No Lungworm Seen	No Lungworm Seen
2016-10-25 11:51:40	DHS Projects (DeBess)	OR	MULTNOMAH	PORTLAND	Holly	Not Provided	5	Y	Female	Topical Flea Medication	None	Feces	17V05431-03.0001	10325	Crypto	Cryptosporidia present
2016-10-25 11:51:40	DHS Projects (DeBess)	OR	MULTNOMAH	PORTLAND	Holly	Not Provided	5	Y	Female	Topical Flea Medication	None	Feces	17V05431-03.0001	10787	Fecal Sugar Centrifuge	No oocysts or eggs detected	No oocysts or eggs detected
2016-10-25 11:51:40	DHS Projects (DeBess)	OR	MULTNOMAH	PORTLAND	Holly	Not Provided	5	Y	Female	Topical Flea Medication	None	Feces	17V05431-03.0001	10788	Giardia - FA	Negative
2016-11-01 10:41:36	DHS Projects (DeBess)	OR	MULTNOMAH	PORTLAND	Petunia	Domestic Shorthaired Cat	10	Y	Female	None	None	Feces	17V05709-01.0001	6005	BAERMAN	Lungworm larvae present	Larvae identified as Aelurostrongylus
2016-11-01 10:41:36	DHS Projects (DeBess)	OR	MULTNOMAH	PORTLAND	Petunia	Domestic Shorthaired Cat	10	Y	Female	None	None	Feces	17V05709-01.0001	10325	Crypto	No Cryptosporidia detected
2016-11-01 10:41:36	DHS Projects (DeBess)	OR	MULTNOMAH	PORTLAND	Petunia	Domestic Shorthaired Cat	10	Y	Female	None	None	Feces	17V05709-01.0001	10787	Fecal Sugar Centrifuge	No oocysts or eggs detected	No oocysts or eggs detected
2016-11-01 10:41:36	DHS Projects (DeBess)	OR	MULTNOMAH	PORTLAND	Petunia	Domestic Shorthaired Cat	10	Y	Female	None	None	Feces	17V05709-01.0001	10788	Giardia - FA	Positive	Positive
2016-11-01 10:41:36	DHS Projects (DeBess)	OR	MULTNOMAH	PORTLAND	Darth Meow	Domestic Shorthaired Cat	4	Y	Female	Topical Flea Medication	None	Feces	17V05709-02.0001	6005	BAERMAN	No Lungworm Seen	No Lungworm Seen
2016-11-01 10:41:36	DHS Projects (DeBess)	OR	MULTNOMAH	PORTLAND	Darth Meow	Domestic Shorthaired Cat	4	Y	Female	Topical Flea Medication	None	Feces	17V05709-02.0001	10325	Crypto	No Cryptosporidia detected
2016-11-01 10:41:36	DHS Projects (DeBess)	OR	MULTNOMAH	PORTLAND	Darth Meow	Domestic Shorthaired Cat	4	Y	Female	Topical Flea Medication	None	Feces	17V05709-02.0001	10787	Fecal Sugar Centrifuge	No oocysts or eggs detected	No oocysts or eggs detected
2016-11-01 10:41:36	DHS Projects (DeBess)	OR	MULTNOMAH	PORTLAND	Darth Meow	Domestic Shorthaired Cat	4	Y	Female	Topical Flea Medication	None	Feces	17V05709-02.0001	10788	Giardia - FA	Positive	Positive
2016-11-29 10:04:50	DHS Projects (DeBess)	OR	MULTNOMAH	PORTLAND	FeralCAT Nov 23-16 #3	Cat	3	M	Female	None	Not Stated	Feces	17V06808-01.0001	6005	BAERMAN	Lungworm larvae present	Lungworm larvae present
2016-11-29 10:04:50	DHS Projects (DeBess)	OR	MULTNOMAH	PORTLAND	FeralCAT Nov 23-16 #3	Cat	3	M	Female	None	Not Stated	Feces	17V06808-01.0001	10325	Crypto	No Cryptosporidia detected
2016-11-29 10:04:50	DHS Projects (DeBess)	OR	MULTNOMAH	PORTLAND	FeralCAT Nov 23-16 #3	Cat	3	M	Female	None	Not Stated	Feces	17V06808-01.0001	10325	Crypto	No Cryptosporidia detected
2016-11-29 10:04:50	DHS Projects (DeBess)	OR	MULTNOMAH	PORTLAND	FeralCAT Nov 23-16 #3	Cat	3	M	Female	None	Not Stated	Feces	17V06808-01.0001	10787	Fecal Sugar Centrifuge	Toxocara cati	Toxocara cati
2016-11-29 10:04:50	DHS Projects (DeBess)	OR	MULTNOMAH	PORTLAND	FeralCAT Nov 23-16 #3	Cat	3	M	Female	None	Not Stated	Feces	17V06808-01.0001	10788	Giardia - FA	Negative	Negative
2016-11-29 10:04:50	DHS Projects (DeBess)	OR	MULTNOMAH	PORTLAND	FeralCAT Nov 23-16 #12	Cat	3	Y	Female	None	Not Stated	Feces	17V06808-01.0002	10325	Crypto	No Cryptosporidia detected
2016-11-29 10:04:50	DHS Projects (DeBess)	OR	MULTNOMAH	PORTLAND	FeralCAT Nov 23-16 #12	Cat	3	Y	Female	None	Not Stated	Feces	17V06808-01.0002	10325	Crypto	No Cryptosporidia detected
2016-11-29 10:04:50	DHS Projects (DeBess)	OR	MULTNOMAH	PORTLAND	FeralCAT Nov 23-16 #12	Cat	3	Y	Female	None	Not Stated	Feces	17V06808-01.0002	10787	Fecal Sugar Centrifuge	No oocysts or eggs detected	No oocysts or eggs detected
2016-11-29 10:04:50	DHS Projects (DeBess)	OR	MULTNOMAH	PORTLAND	FeralCAT Nov 23-16 #12	Cat	3	Y	Female	None	Not Stated	Feces	17V06808-01.0002	10788	Giardia - FA	Negative	Negative
2016-11-29 10:04:50	DHS Projects (DeBess)	OR	MULTNOMAH	PORTLAND	FeralCAT Nov 23-16 #13	Cat	5	Y	Female	None	Not Stated	Feces	17V06808-01.0003	6005	BAERMAN	No Lungworm Seen	No Lungworm Seen
2016-11-29 10:04:50	DHS Projects (DeBess)	OR	MULTNOMAH	PORTLAND	FeralCAT Nov 23-16 #13	Cat	5	Y	Female	None	Not Stated	Feces	17V06808-01.0003	10325	Crypto	No Cryptosporidia detected
2016-11-29 10:04:50	DHS Projects (DeBess)	OR	MULTNOMAH	PORTLAND	FeralCAT Nov 23-16 #13	Cat	5	Y	Female	None	Not Stated	Feces	17V06808-01.0003	10787	Fecal Sugar Centrifuge	Toxocara cati	Toxocara cati
2016-11-29 10:04:50	DHS Projects (DeBess)	OR	MULTNOMAH	PORTLAND	FeralCAT Nov 23-16 #13	Cat	5	Y	Female	None	Not Stated	Feces	17V06808-01.0003	10788	Giardia - FA	Negative	Negative
2016-11-29 10:04:50	DHS Projects (DeBess)	OR	MULTNOMAH	PORTLAND	FeralCAT Nov 23-16 #16	Cat	6	Y	Female	None	Not Stated	Feces	17V06808-01.0004	6005	BAERMAN	No Lungworm Seen	No Lungworm Seen
2016-11-29 10:04:50	DHS Projects (DeBess)	OR	MULTNOMAH	PORTLAND	FeralCAT Nov 23-16 #16	Cat	6	Y	Female	None	Not Stated	Feces	17V06808-01.0004	10325	Crypto	Cryptosporidia present - Sm #
2016-11-29 10:04:50	DHS Projects (DeBess)	OR	MULTNOMAH	PORTLAND	FeralCAT Nov 23-16 #16	Cat	6	Y	Female	None	Not Stated	Feces	17V06808-01.0004	10787	Fecal Sugar Centrifuge	No oocysts or eggs detected	No oocysts or eggs detected
2016-11-29 10:04:50	DHS Projects (DeBess)	OR	MULTNOMAH	PORTLAND	FeralCAT Nov 23-16 #16	Cat	6	Y	Female	None	Not Stated	Feces	17V06808-01.0004	10788	Giardia - FA	Negative	Negative
2016-11-29 10:04:50	DHS Projects (DeBess)	OR	MULTNOMAH	PORTLAND	FeralCAT Nov 23-16 #18	Cat	4	Y	Male	None	Not Stated	Feces	17V06808-01.0005	10325	Crypto	No Cryptosporidia detected
2016-11-29 10:04:50	DHS Projects (DeBess)	OR	MULTNOMAH	PORTLAND	FeralCAT Nov 23-16 #18	Cat	4	Y	Male	None	Not Stated	Feces	17V06808-01.0005	10787	Fecal Sugar Centrifuge	No oocysts or eggs detected	No oocysts or eggs detected
2016-11-29 10:04:50	DHS Projects (DeBess)	OR	MULTNOMAH	PORTLAND	FeralCAT Nov 23-16 #18	Cat	4	Y	Male	None	Not Stated	Feces	17V06808-01.0005	10788	Giardia - FA	Negative	Negative
2016-11-29 10:04:50	DHS Projects (DeBess)	OR	MULTNOMAH	PORTLAND	Young Nov 21-16 #4691	Cat	3	Y	Male	None	Not Stated	Feces	17V06808-01.0006	6005	BAERMAN	No Lungworm Seen	No Lungworm Seen
2016-11-29 10:04:50	DHS Projects (DeBess)	OR	MULTNOMAH	PORTLAND	Young Nov 21-16 #4691	Cat	3	Y	Male	None	Not Stated	Feces	17V06808-01.0006	10325	Crypto	Cryptosporidia present - Rare
2016-11-29 10:04:50	DHS Projects (DeBess)	OR	MULTNOMAH	PORTLAND	Young Nov 21-16 #4691	Cat	3	Y	Male	None	Not Stated	Feces	17V06808-01.0006	10787	Fecal Sugar Centrifuge	Isospora	Isospora
2016-11-29 10:04:50	DHS Projects (DeBess)	OR	MULTNOMAH	PORTLAND	Young Nov 21-16 #4691	Cat	3	Y	Male	None	Not Stated	Feces	17V06808-01.0006	10788	Giardia - FA	Negative	Negative
2016-11-29 10:04:50	DHS Projects (DeBess)	OR	MULTNOMAH	PORTLAND	Nash-kille NOV21-16 #5951	Cat	2.5	M	Male	None	Not Stated	Feces	17V06808-01.0007	6005	BAERMAN	No Lungworm Seen	No Lungworm Seen
2016-11-29 10:04:50	DHS Projects (DeBess)	OR	MULTNOMAH	PORTLAND	Nash-kille NOV21-16 #5951	Cat	2.5	M	Male	None	Not Stated	Feces	17V06808-01.0007	10325	Crypto	No Cryptosporidia detected
2016-11-29 10:04:50	DHS Projects (DeBess)	OR	MULTNOMAH	PORTLAND	Nash-kille NOV21-16 #5951	Cat	2.5	M	Male	None	Not Stated	Feces	17V06808-01.0007	10787	Fecal Sugar Centrifuge	No oocysts or eggs detected	No oocysts or eggs detected
2016-11-29 10:04:50	DHS Projects (DeBess)	OR	MULTNOMAH	PORTLAND	Nash-kille NOV21-16 #5951	Cat	2.5	M	Male	None	Not Stated	Feces	17V06808-01.0007	10788	Giardia - FA	Negative	Negative
2016-11-29 10:04:50	DHS Projects (DeBess)	OR	MULTNOMAH	PORTLAND	Brewster NOV26-16 #4611	Cat	18	M	Male	Topical Flea Medication	Not Stated	Feces	17V06808-01.0008	6005	BAERMAN	No Lungworm Seen	No Lungworm Seen
2016-11-29 10:04:50	DHS Projects (DeBess)	OR	MULTNOMAH	PORTLAND	Brewster NOV26-16 #4611	Cat	18	M	Male	Topical Flea Medication	Not Stated	Feces	17V06808-01.0008	10325	Crypto	No Cryptosporidia detected
2016-11-29 10:04:50	DHS Projects (DeBess)	OR	MULTNOMAH	PORTLAND	Brewster NOV26-16 #4611	Cat	18	M	Male	Topical Flea Medication	Not Stated	Feces	17V06808-01.0008	10787	Fecal Sugar Centrifuge	No oocysts or eggs detected	No oocysts or eggs detected
2016-11-29 10:04:50	DHS Projects (DeBess)	OR	MULTNOMAH	PORTLAND	Brewster NOV26-16 #4611	Cat	18	M	Male	Topical Flea Medication	Not Stated	Feces	17V06808-01.0008	10788	Giardia - FA	Negative	Negative
2016-12-02 11:17:47	DHS Projects (DeBess)	OR	MULTNOMAH	PORTLAND	Nina	Domestic Shorthaired Cat	12.8	Y	Female	Topical Flea Medication	Not Stated	Feces	17V06994-01.0001	10325	Crypto	No Cryptosporidia detected
2016-12-02 11:17:47	DHS Projects (DeBess)	OR	MULTNOMAH	PORTLAND	Nina	Domestic Shorthaired Cat	12.8	Y	Female	Topical Flea Medication	Not Stated	Feces	17V06994-01.0001	10787	Fecal Sugar Centrifuge	No oocysts or eggs detected	No oocysts or eggs detected
2016-12-02 11:17:47	DHS Projects (DeBess)	OR	MULTNOMAH	PORTLAND	Nina	Domestic Shorthaired Cat	12.8	Y	Female	Topical Flea Medication	Not Stated	Feces	17V06994-01.0001	10788	Giardia - FA	Negative	Negative
2016-12-02 11:17:47	DHS Projects (DeBess)	OR	MULTNOMAH	PORTLAND	Ringo	Domestic Shorthaired Cat	6.9	Y	Male	Topical Flea Medication	Not Stated	Feces	17V06994-02.0001	6005	BAERMAN	Lungworm larvae present	Larvae identified as Aelurostrongylus
2016-12-02 11:17:47	DHS Projects (DeBess)	OR	MULTNOMAH	PORTLAND	Ringo	Domestic Shorthaired Cat	6.9	Y	Male	Topical Flea Medication	Not Stated	Feces	17V06994-02.0001	10325	Crypto	No Cryptosporidia detected
2016-12-02 11:17:47	DHS Projects (DeBess)	OR	MULTNOMAH	PORTLAND	Ringo	Domestic Shorthaired Cat	6.9	Y	Male	Topical Flea Medication	Not Stated	Feces	17V06994-02.0001	10787	Fecal Sugar Centrifuge	No oocysts or eggs detected	No oocysts or eggs detected
2016-12-02 11:17:47	DHS Projects (DeBess)	OR	MULTNOMAH	PORTLAND	Ringo	Domestic Shorthaired Cat	6.9	Y	Male	Topical Flea Medication	Not Stated	Feces	17V06994-02.0001	10788	Giardia - FA	Negative	Negative
2016-12-02 11:17:47	DHS Projects (DeBess)	OR	MULTNOMAH	PORTLAND	Cameron Nov30-2016 glastone	DMH Cat	8.1	Y	Male	Topical Flea Medication	Not Stated	Feces	17V06994-03.0001	6005	BAERMAN	No Lungworm Seen	No Lungworm Seen
2016-12-02 11:17:47	DHS Projects (DeBess)	OR	MULTNOMAH	PORTLAND	Cameron Nov30-2016 glastone	DMH Cat	8.1	Y	Male	Topical Flea Medication	Not Stated	Feces	17V06994-03.0001	10325	Crypto	No Cryptosporidia detected
2016-12-02 11:17:47	DHS Projects (DeBess)	OR	MULTNOMAH	PORTLAND	Cameron Nov30-2016 glastone	DMH Cat	8.1	Y	Male	Topical Flea Medication	Not Stated	Feces	17V06994-03.0001	10787	Fecal Sugar Centrifuge	Coccidia	Coccidia
2016-12-02 11:17:47	DHS Projects (DeBess)	OR	MULTNOMAH	PORTLAND	Cameron Nov30-2016 glastone	DMH Cat	8.1	Y	Male	Topical Flea Medication	Not Stated	Feces	17V06994-03.0001	10788	Giardia - FA	Positive	Positive
2017-01-13 11:58:29	DHS Projects (DeBess)	OR	MULTNOMAH	PORTLAND	Little Bean - Hillsdale	DSH	6	M	Female	Not Stated	Not Stated	Feces	17V08477-01.0001	6005	BAERMAN	Lungworm larvae present	Lungworm larvae present Aelurostrongylus
2017-01-13 11:58:29	DHS Projects (DeBess)	OR	MULTNOMAH	PORTLAND	Little Bean - Hillsdale	DSH	6	M	Female	Not Stated	Not Stated	Feces	17V08477-01.0001	10787	Fecal Sugar Centrifuge	No oocysts or eggs detected	No oocysts or eggs detected
2017-01-13 11:58:29	DHS Projects (DeBess)	OR	MULTNOMAH	PORTLAND	Little Bean - Hillsdale	DSH	6	M	Female	Not Stated	Not Stated	Feces	17V08477-01.0001	10788	GIARDIA - FA Batch	Giardia - FA	Negative
2017-01-13 11:58:29	DHS Projects (DeBess)	OR	MULTNOMAH	PORTLAND	Little Bean - Hillsdale	DSH	6	M	Female	Not Stated	Not Stated	Feces	17V08477-01.0001	10325	Crypto	No Cryptosporidia detected
2017-01-13 11:58:29	DHS Projects (DeBess)	OR	MULTNOMAH	PORTLAND	Raz - Hillsdale	DMH Cat	16	Y	Female	Not Stated	Not Stated	Feces	17V08477-01.0002	6005	BAERMAN	No Lungworm Seen	No Lungworm Seen
2017-01-13 11:58:29	DHS Projects (DeBess)	OR	MULTNOMAH	PORTLAND	Raz - Hillsdale	DMH Cat	16	Y	Female	Not Stated	Not Stated	Feces	17V08477-01.0002	10787	Fecal Sugar Centrifuge	No oocysts or eggs detected	No oocysts or eggs detected
2017-01-13 11:58:29	DHS Projects (DeBess)	OR	MULTNOMAH	PORTLAND	Raz - Hillsdale	DMH Cat	16	Y	Female	Not Stated	Not Stated	Feces	17V08477-01.0002	10788	GIARDIA - FA Batch	Giardia - FA	Positive
2017-01-13 11:58:29	DHS Projects (DeBess)	OR	MULTNOMAH	PORTLAND	Raz - Hillsdale	DMH Cat	16	Y	Female	Not Stated	Not Stated	Feces	17V08477-01.0002	10325	Crypto	No Cryptosporidia detected
2017-01-13 11:58:29	DHS Projects (DeBess)	OR	MULTNOMAH	PORTLAND	Dec #30 Feral Cat 1/6	DSH	5	M	Female	Not Stated	Not Stated	Feces	17V08477-01.0003	10787	Fecal Sugar Centrifuge	Toxocara cati	Toxocara cati
2017-01-13 11:58:29	DHS Projects (DeBess)	OR	MULTNOMAH	PORTLAND	Dec #30 Feral Cat 1/6	DSH	5	M	Female	Not Stated	Not Stated	Feces	17V08477-01.0003	10788	GIARDIA - FA Batch	Giardia - FA	Negative
2017-01-13 11:58:29	DHS Projects (DeBess)	OR	MULTNOMAH	PORTLAND	Dec #30 Feral Cat 1/6	DSH	5	M	Female	Not Stated	Not Stated	Feces	17V08477-01.0003	10325	Crypto	Cryptosporidia present
2017-01-13 11:58:29	DHS Projects (DeBess)	OR	MULTNOMAH	PORTLAND	Dec #30 Feral Cat 1/6	DSH	5	M	Female	Not Stated	Not Stated	Feces	17V08477-01.0004	6005	BAERMAN	No Lungworm Seen	No Lungworm Seen
2017-01-13 11:58:29	DHS Projects (DeBess)	OR	MULTNOMAH	PORTLAND	Dec #35 Feral Cat 1/6	DSH	Adult	D	Male	Not Stated	Not Stated	Feces	17V08477-01.0004	10787	Fecal Sugar Centrifuge	Toxocara cati	Toxocara cati
2017-01-13 11:58:29	DHS Projects (DeBess)	OR	MULTNOMAH	PORTLAND	Dec #35 Feral Cat 1/6	DSH	Adult	D	Male	Not Stated	Not Stated	Feces	17V08477-01.0004	10788	GIARDIA - FA Batch	Giardia - FA	Negative
2017-01-13 11:58:29	DHS Projects (DeBess)	OR	MULTNOMAH	PORTLAND	Dec #35 Feral Cat 1/6	DSH	Adult	D	Male	Not Stated	Not Stated	Feces	17V08477-01.0004	10325	Crypto	No Cryptosporidia detected
2017-01-13 11:58:29	DHS Projects (DeBess)	OR	MULTNOMAH	PORTLAND	Dec #35 Feral Cat 1/6	DSH	Adult	D	Male	Not Stated	Not Stated	Feces	17V08477-01.0005	6005	BAERMAN	No Lungworm Seen	No Lungworm Seen
2017-01-13 11:58:29	DHS Projects (DeBess)	OR	MULTNOMAH	PORTLAND	Dec #33 Feral Cat 1/6	DSH	Adult	D	Female	Not Stated	Not Stated	Feces	17V08477-01.0005	10787	Fecal Sugar Centrifuge	No oocysts or eggs detected	No oocysts or eggs detected
2017-01-13 11:58:29	DHS Projects (DeBess)	OR	MULTNOMAH	PORTLAND	Dec #33 Feral Cat 1/6	DSH	Adult	D	Female	Not Stated	Not Stated	Feces	17V08477-01.0005	10788	GIARDIA - FA Batch	Giardia - FA	Negative
2017-01-13 11:58:29	DHS Projects (DeBess)	OR	MULTNOMAH	PORTLAND	Dec #33 Feral Cat 1/6	DSH	Adult	D	Female	Not Stated	Not Stated	Feces	17V08477-01.0005	10325	Crypto	No Cryptosporidia detected
2017-01-13 11:58:29	DHS Projects (DeBess)	OR	MULTNOMAH	PORTLAND	Dec #33 Feral Cat 1/6	DSH	Adult	D	Female	Not Stated	Not Stated	Feces	17V08477-01.0006	6005	BAERMAN	No Lungworm Seen	No Lungworm Seen
2017-01-13 11:58:29	DHS Projects (DeBess)	OR	MULTNOMAH	PORTLAND	Dec #30 1/5 Feral Cat	DSH	3	M	Female	Not Stated	Not Stated	Feces	17V08477-01.0006	10787	Fecal Sugar Centrifuge	Toxocara cati	Toxocara cati
2017-01-13 11:58:29	DHS Projects (DeBess)	OR	MULTNOMAH	PORTLAND	Dec #30 1/5 Feral Cat	DSH	3	M	Female	Not Stated	Not Stated	Feces	17V08477-01.0006	10788	GIARDIA - FA Batch	Giardia - FA	Negative
2017-01-13 11:58:29	DHS Projects (DeBess)	OR	MULTNOMAH	PORTLAND	Dec #30 1/5 Feral Cat	DSH	3	M	Female	Not Stated	Not Stated	Feces	17V08477-01.0006	10325	Crypto	No Cryptosporidia detected
2017-01-13 11:58:29	DHS Projects (DeBess)	OR	MULTNOMAH	PORTLAND	Dec #30 1/5 Feral Cat	DSH	3	M	Female	Not Stated	Not Stated	Feces	17V08477-01.0007	6005	BAERMAN	No Lungworm Seen	No Lungworm Seen
2017-01-13 11:58:29	DHS Projects (DeBess)	OR	MULTNOMAH	PORTLAND	De #17 1/5 Feral Cat	DSH	5	M	Female	Not Stated	Not Stated	Feces	17V08477-01.0007	10787	Fecal Sugar Centrifuge	No oocysts or eggs detected	No oocysts or eggs detected
2017-01-13 11:58:29	DHS Projects (DeBess)	OR	MULTNOMAH	PORTLAND	De #17 1/5 Feral Cat	DSH	5	M	Female	Not Stated	Not Stated	Feces	17V08477-01.0007	10788	GIARDIA - FA Batch	Giardia - FA	Negative
2017-01-13 11:58:29	DHS Projects (DeBess)	OR	MULTNOMAH	PORTLAND	De #17 1/5 Feral Cat	DSH	5	M	Female	Not Stated	Not Stated	Feces	17V08477-01.0007	10325	Crypto	No Cryptosporidia detected
2017-01-13 11:58:29	DHS Projects (DeBess)	OR	MULTNOMAH	PORTLAND	De #17 1/5 Feral Cat	DSH	5	M	Female	Not Stated	Not Stated	Feces	17V08477-01.0008	6005	BAERMAN	No Lungworm Seen	No Lungworm Seen
2017-01-13 11:58:29	DHS Projects (DeBess)	OR	MULTNOMAH	PORTLAND	De #17 1/5 Feral Cat	DSH	5	M	Female	Not Stated	Not Stated	Feces	17V08477-01.0008	10787	Fecal Sugar Centrifuge	Toxocara cati	Toxocara cati
2017-01-13 11:58:29	DHS Projects (DeBess)	OR	MULTNOMAH	PORTLAND	De #17 1/5 Feral Cat	DSH	5	M	Female	Not Stated	Not Stated	Feces	17V08477-01.0008	10788	GIARDIA - FA Batch	Giardia - FA	Negative
2017-01-13 11:58:29	DHS Projects (DeBess)	OR	MULTNOMAH	PORTLAND	De #17 1/5 Feral Cat	DSH	5	M	Female	Not Stated	Not Stated	Feces	17V08477-01.0008	10325	Crypto	No Cryptosporidia detected
2017-02-02 11:39:14	DHS Projects (DeBess)	OR	MULTNOMAH	PORTLAND	Feral cat Jan #6	Cat	Adult 1-7	D	Male	None	Not Stated	Feces	17V09341-01.0001	6005	BAERMAN	No Lungworm Seen	No Lungworm Seen
2017-02-02 11:39:14	DHS Projects (DeBess)	OR	MULTNOMAH	PORTLAND	Feral cat Jan #6	Cat	Adult 1-7	D	Male	None	Not Stated	Feces	17V09341-01.0001	10787	Fecal Sugar Centrifuge	Toxocara cati	Toxocara cati
2017-02-02 11:39:14	DHS Projects (DeBess)	OR	MULTNOMAH	PORTLAND	Feral cat Jan #6	Cat	Adult 1-7	D	Male	None	Not Stated	Feces	17V09341-01.0001	10788	GIARDIA - FA Batch	Giardia - FA	Negative
2017-02-02 11:39:14	DHS Projects (DeBess)	OR	MULTNOMAH	PORTLAND	Feral cat Jan #6	Cat	Adult 1-7	D	Male	None	Not Stated	Feces	17V09341-01.0001	10325	Crypto	No Cryptosporidia detected
2017-02-02 11:39:14	DHS Projects (DeBess)	OR	MULTNOMAH	PORTLAND	Feral cat Jan #7	Cat	Adult 1-7	D	Female	None	Not Stated	Feces	17V09341-01.0002	6005	BAERMAN	Lungworm larvae present	Lungworm larvae identified as Aelurostrongylus
2017-02-02 11:39:14	DHS Projects (DeBess)	OR	MULTNOMAH	PORTLAND	Feral cat Jan #7	Cat	Adult 1-7	D	Female	None	Not Stated	Feces	17V09341-01.0002	10787	Fecal Sugar Centrifuge	Toxocara cati	Toxocara cati
2017-02-02 11:39:14	DHS Projects (DeBess)	OR	MULTNOMAH	PORTLAND	Feral cat Jan #7	Cat	Adult 1-7	D	Female	None	Not Stated	Feces	17V09341-01.0002	10787	Fecal Sugar Centrifuge	Trichuris	Trichuris
2017-02-02 11:39:14	DHS Projects (DeBess)	OR	MULTNOMAH	PORTLAND	Feral cat Jan #7	Cat	Adult 1-7	D	Female	None	Not Stated	Feces	17V09341-01.0002	10788	GIARDIA - FA Batch	Giardia - FA	Negative
2017-02-02 11:39:14	DHS Projects (DeBess)	OR	MULTNOMAH	PORTLAND	Feral cat Jan #7	Cat	Adult 1-7	D	Female	None	Not Stated	Feces	17V09341-01.0002	10325	Crypto	No Cryptosporidia detected
2017-02-02 11:39:14	DHS Projects (DeBess)	OR	MULTNOMAH	PORTLAND	Feral cat Jan #9	Cat	Adult 1-7	D	Male	None	Not Stated	Feces	17V09341-01.0003	6005	BAERMAN	Lungworm larvae present	Lungworm larvae identified as Aelurostrongylus
2017-02-02 11:39:14	DHS Projects (DeBess)	OR	MULTNOMAH	PORTLAND	Feral cat Jan #9	Cat	Adult 1-7	D	Male	None	Not Stated	Feces	17V09341-01.0003	10787	Fecal Sugar Centrifuge	Toxocara cati	Toxocara cati
2017-02-02 11:39:14	DHS Projects (DeBess)	OR	MULTNOMAH	PORTLAND	Feral cat Jan #9	Cat	Adult 1-7	D	Male	None	Not Stated	Feces	17V09341-01.0003	10788	GIARDIA - FA Batch	Giardia - FA	Negative
2017-02-02 11:39:14	DHS Projects (DeBess)	OR	MULTNOMAH	PORTLAND	Feral cat Jan #9	Cat	Adult 1-7	D	Male	None	Not Stated	Feces	17V09341-01.0003	10325	Crypto	Cryptosporidia present
2017-02-02 11:39:14	DHS Projects (DeBess)	OR	MULTNOMAH	PORTLAND	Feral cat Jan #12	Cat	Adult 1-7	D	Male	None	Not Stated	Feces	17V09341-01.0004	6005	BAERMAN	Lungworm larvae present	Lungworm larvae identified as Aelurostrongylus
2017-02-02 11:39:14	DHS Projects (DeBess)	OR	MULTNOMAH	PORTLAND	Feral cat Jan #12	Cat	Adult 1-7	D	Male	None	Not Stated	Feces	17V09341-01.0004	10787	Fecal Sugar Centrifuge	Taenia sp.	Taenia sp.
2017-02-02 11:39:14	DHS Projects (DeBess)	OR	MULTNOMAH	PORTLAND	Feral cat Jan #12	Cat	Adult 1-7	D	Male	None	Not Stated	Feces	17V09341-01.0004	10788	GIARDIA - FA Batch	Giardia - FA	Negative
2017-02-02 11:39:14	DHS Projects (DeBess)	OR	MULTNOMAH	PORTLAND	Feral cat Jan #12	Cat	Adult 1-7	D	Male	None	Not Stated	Feces	17V09341-01.0004	10325	Crypto	No Cryptosporidia detected
2017-02-02 11:39:14	DHS Projects (DeBess)	OR	MULTNOMAH	PORTLAND	Feral cat Jan #17	Cat	Adult 1-7	D	Male	None	Not Stated	Feces	17V09341-01.0005	6005	BAERMAN	Lungworm larvae present	Lungworm larvae identified as Aelurostrongylus
2017-02-02 11:39:14	DHS Projects (DeBess)	OR	MULTNOMAH	PORTLAND	Feral cat Jan #17	Cat	Adult 1-7	D	Male	None	Not Stated	Feces	17V09341-01.0005	10787	Fecal Sugar Centrifuge	Toxocara cati	Toxocara cati
2017-02-02 11:39:14	DHS Projects (DeBess)	OR	MULTNOMAH	PORTLAND	Feral cat Jan #17	Cat	Adult 1-7	D	Male	None	Not Stated	Feces	17V09341-01.0005	10787	Fecal Sugar Centrifuge	Taenia sp.	Taenia sp.
2017-02-02 11:39:14	DHS Projects (DeBess)	OR	MULTNOMAH	PORTLAND	Feral cat Jan #17	Cat	Adult 1-7	D	Male	None	Not Stated	Feces	17V09341-01.0005	10788	GIARDIA - FA Batch	Giardia - FA	Negative
2017-02-02 11:39:14	DHS Projects (DeBess)	OR	MULTNOMAH	PORTLAND	Feral cat Jan #17	Cat	Adult 1-7	D	Male	None	Not Stated	Feces	17V09341-01.0005	10325	Crypto	No Cryptosporidia detected
2017-02-02 11:39:14	DHS Projects (DeBess)	OR	MULTNOMAH	PORTLAND	Feral cat Jan #23	Cat	Adult 1-7	D	Female	None	Not Stated	Feces	17V09341-01.0006	6005	BAERMAN	No Lungworm Seen	No Lungworm Seen
2017-02-02 11:39:14	DHS Projects (DeBess)	OR	MULTNOMAH	PORTLAND	Feral cat Jan #23	Cat	Adult 1-7	D	Female	None	Not Stated	Feces	17V09341-01.0006	10787	Fecal Sugar Centrifuge	No oocysts or eggs detected	No oocysts or eggs detected
2017-02-02 11:39:14	DHS Projects (DeBess)	OR	MULTNOMAH	PORTLAND	Feral cat Jan #23	Cat	Adult 1-7	D	Female	None	Not Stated	Feces	17V09341-01.0006	10788	GIARDIA - FA Batch	Giardia - FA	Negative
2017-02-02 11:39:14	DHS Projects (DeBess)	OR	MULTNOMAH	PORTLAND	Feral cat Jan #23	Cat	Adult 1-7	D	Female	None	Not Stated	Feces	17V09341-01.0006	10325	Crypto	Cryptosporidia present
2017-02-02 11:39:14	DHS Projects (DeBess)	OR	MULTNOMAH	PORTLAND	Bonzai Hillsdale	DSH	3	Y	Male neutered	None	Not Stated	Feces	17V09341-01.0007	6005	BAERMAN	Lungworm larvae present	Lungworm larvae identified as Aelurostrongylus
2017-02-02 11:39:14	DHS Projects (DeBess)	OR	MULTNOMAH	PORTLAND	Bonzai Hillsdale	DSH	3	Y	Male neutered	None	Not Stated	Feces	17V09341-01.0007	10787	Fecal Sugar Centrifuge	No oocysts or eggs detected	No oocysts or eggs detected
2017-02-02 11:39:14	DHS Projects (DeBess)	OR	MULTNOMAH	PORTLAND	Bonzai Hillsdale	DSH	3	Y	Male neutered	None	Not Stated	Feces	17V09341-01.0007	10788	GIARDIA - FA Batch	Giardia - FA	Negative
2017-02-02 11:39:14	DHS Projects (DeBess)	OR	MULTNOMAH	PORTLAND	Bonzai Hillsdale	DSH	3	Y	Male neutered	None	Not Stated	Feces	17V09341-01.0007	10325	Crypto	No Cryptosporidia detected
2017-02-02 11:39:14	DHS Projects (DeBess)	OR	MULTNOMAH	PORTLAND	Kiki Hillsdale	DLH	7	Y	Female spayed	None	Not Stated	Feces	17V09341-01.0008	6005	BAERMAN	Lungworm larvae present	Lungworm larvae identified as Aelurostrongylus
2017-02-02 11:39:14	DHS Projects (DeBess)	OR	MULTNOMAH	PORTLAND	Kiki Hillsdale	DLH	7	Y	Female spayed	None	Not Stated	Feces	17V09341-01.0008	10787	Fecal Sugar Centrifuge	No oocysts or eggs detected	No oocysts or eggs detected
2017-02-02 11:39:14	DHS Projects (DeBess)	OR	MULTNOMAH	PORTLAND	Kiki Hillsdale	DLH	7	Y	Female spayed	None	Not Stated	Feces	17V09341-01.0008	10788	GIARDIA - FA Batch	Giardia - FA	Negative
2017-02-02 11:39:14	DHS Projects (DeBess)	OR	MULTNOMAH	PORTLAND	Kiki Hillsdale	DLH	7	Y	Female spayed	None	Not Stated	Feces	17V09341-01.0008	10325	Crypto	No Cryptosporidia detected
2017-02-02 11:39:14	DHS Projects (DeBess)	OR	MULTNOMAH	PORTLAND	Dexter Lombard VET	Cat	Adult	D	Not Stated	Not Stated	Not Stated	Feces	17V09341-01.0009	10787	Fecal Sugar Centrifuge	Toxocara cati	Toxocara cati
2017-02-02 11:39:14	DHS Projects (DeBess)	OR	MULTNOMAH	PORTLAND	Dexter Lombard VET	Cat	Adult	D	Not Stated	Not Stated	Not Stated	Feces	17V09341-01.0009	10788	GIARDIA - FA Batch	Giardia - FA	Negative
2017-02-02 11:39:14	DHS Projects (DeBess)	OR	MULTNOMAH	PORTLAND	Dexter Lombard VET	Cat	Adult	D	Not Stated	Not Stated	Not Stated	Feces	17V09341-01.0009	10325	Crypto	Cryptosporidia present
2017-03-03 10:17:41	DHS Projects (DeBess)	OR	MULTNOMAH	PORTLAND	Suzzie Lombard FEB 001	Cat	8	Y	Not Stated	Not Stated	Not Stated	Feces	17V10693-01.0001	6005	BAERMAN	Insufficient sample to test
2017-03-03 10:17:41	DHS Projects (DeBess)	OR	MULTNOMAH	PORTLAND	Suzzie Lombard FEB 001	Cat	8	Y	Not Stated	Not Stated	Not Stated	Feces	17V10693-01.0001	10787	Fecal Sugar Centrifuge	No oocysts or eggs detected	No oocysts or eggs detected
2017-03-03 10:17:41	DHS Projects (DeBess)	OR	MULTNOMAH	PORTLAND	Suzzie Lombard FEB 001	Cat	8	Y	Not Stated	Not Stated	Not Stated	Feces	17V10693-01.0001	10788	GIARDIA - FA Batch	Giardia - FA	Negative
2017-03-03 10:17:41	DHS Projects (DeBess)	OR	MULTNOMAH	PORTLAND	Suzzie Lombard FEB 001	Cat	8	Y	Not Stated	Not Stated	Not Stated	Feces	17V10693-01.0001	10325	Crypto	Cryptosporidia present - Sm #
2017-03-03 10:17:41	DHS Projects (DeBess)	OR	MULTNOMAH	PORTLAND	Blue Hillsdale FEB 002	Cat	2	Y	Not Stated	Not Stated	Not Stated	Feces	17V10693-01.0002	6005	BAERMAN	Lungworm larvae present	Larvae identified as Aelurostrongylus
2017-03-03 10:17:41	DHS Projects (DeBess)	OR	MULTNOMAH	PORTLAND	Blue Hillsdale FEB 002	Cat	2	Y	Not Stated	Not Stated	Not Stated	Feces	17V10693-01.0002	10787	Fecal Sugar Centrifuge	No oocysts or eggs detected	No oocysts or eggs detected
2017-03-03 10:17:41	DHS Projects (DeBess)	OR	MULTNOMAH	PORTLAND	Blue Hillsdale FEB 002	Cat	2	Y	Not Stated	Not Stated	Not Stated	Feces	17V10693-01.0002	10788	GIARDIA - FA Batch	Giardia - FA	Negative
2017-03-03 10:17:41	DHS Projects (DeBess)	OR	MULTNOMAH	PORTLAND	Blue Hillsdale FEB 002	Cat	2	Y	Not Stated	Not Stated	Not Stated	Feces	17V10693-01.0002	10325	Crypto	No Cryptosporidia detected
2017-03-03 10:17:41	DHS Projects (DeBess)	OR	MULTNOMAH	PORTLAND	Jean Lue Hillsdale FEB 003	Cat	0	D	Not Stated	Not Stated	Not Stated	Feces	17V10693-01.0003	6005	BAERMAN	No Lungworm Seen	No Lungworm Seen
2017-03-03 10:17:41	DHS Projects (DeBess)	OR	MULTNOMAH	PORTLAND	Jean Lue Hillsdale FEB 003	Cat	0	D	Not Stated	Not Stated	Not Stated	Feces	17V10693-01.0003	10787	Fecal Sugar Centrifuge	No oocysts or eggs detected	No oocysts or eggs detected
2017-03-03 10:17:41	DHS Projects (DeBess)	OR	MULTNOMAH	PORTLAND	Jean Lue Hillsdale FEB 003	Cat	0	D	Not Stated	Not Stated	Not Stated	Feces	17V10693-01.0003	10788	GIARDIA - FA Batch	Giardia - FA	Positive
2017-03-03 10:17:41	DHS Projects (DeBess)	OR	MULTNOMAH	PORTLAND	Jean Lue Hillsdale FEB 003	Cat	0	D	Not Stated	Not Stated	Not Stated	Feces	17V10693-01.0003	10325	Crypto	No Cryptosporidia detected
2017-03-08 10:03:43	DHS Projects (DeBess)	OR	MULTNOMAH	PORTLAND	Feb Feral Cat #7	Cat	Adult 1-7	D	Male	None	Not Stated	Feces	17V10876-01.0001	6005	BAERMAN	No Lungworm Seen	No Lungworm Seen
2017-03-08 10:03:43	DHS Projects (DeBess)	OR	MULTNOMAH	PORTLAND	Feb Feral Cat #7	Cat	Adult 1-7	D	Male	None	Not Stated	Feces	17V10876-01.0001	10787	Fecal Sugar Centrifuge	No oocysts or eggs detected	No oocysts or eggs detected
2017-03-08 10:03:43	DHS Projects (DeBess)	OR	MULTNOMAH	PORTLAND	Feb Feral Cat #7	Cat	Adult 1-7	D	Male	None	Not Stated	Feces	17V10876-01.0001	10788	GIARDIA - FA Batch	Giardia - FA	Negative
2017-03-08 10:03:43	DHS Projects (DeBess)	OR	MULTNOMAH	PORTLAND	Feb Feral Cat #7	Cat	Adult 1-7	D	Male	None	Not Stated	Feces	17V10876-01.0001	10325	Crypto	No Cryptosporidia detected
2017-03-08 10:03:43	DHS Projects (DeBess)	OR	MULTNOMAH	PORTLAND	Feb Feral Cat #16	Cat	Adult 1-7	D	Female	None	Not Stated	Feces	17V10876-01.0002	10787	Fecal Sugar Centrifuge	No oocysts or eggs detected	No oocysts or eggs detected
2017-03-08 10:03:43	DHS Projects (DeBess)	OR	MULTNOMAH	PORTLAND	Feb Feral Cat #16	Cat	Adult 1-7	D	Female	None	Not Stated	Feces	17V10876-01.0002	10788	GIARDIA - FA Batch	Giardia - FA	Negative
2017-03-08 10:03:43	DHS Projects (DeBess)	OR	MULTNOMAH	PORTLAND	Feb Feral Cat #16	Cat	Adult 1-7	D	Female	None	Not Stated	Feces	17V10876-01.0002	10325	Crypto	Cryptosporidia present
2017-03-08 10:03:43	DHS Projects (DeBess)	OR	MULTNOMAH	PORTLAND	Feb Feral Cat #16	Cat	Adult 1-7	D	Female	None	Not Stated	Feces	17V10876-01.0003	6005	BAERMAN	No Lungworm Seen	No Lungworm Seen
2017-03-08 10:03:43	DHS Projects (DeBess)	OR	MULTNOMAH	PORTLAND	Feb Feral Cat #16	Cat	Adult 1-7	D	Female	None	Not Stated	Feces	17V10876-01.0003	10787	Fecal Sugar Centrifuge	Toxocara cati	Toxocara cati
2017-03-08 10:03:43	DHS Projects (DeBess)	OR	MULTNOMAH	PORTLAND	Feb Feral Cat #16	Cat	Adult 1-7	D	Female	None	Not Stated	Feces	17V10876-01.0003	10787	Fecal Sugar Centrifuge	Uncinaria	Uncinaria
2017-03-08 10:03:43	DHS Projects (DeBess)	OR	MULTNOMAH	PORTLAND	Feb Feral Cat #16	Cat	Adult 1-7	D	Female	None	Not Stated	Feces	17V10876-01.0003	10788	GIARDIA - FA Batch	Giardia - FA	Negative
2017-03-08 10:03:43	DHS Projects (DeBess)	OR	MULTNOMAH	PORTLAND	Feb Feral Cat #16	Cat	Adult 1-7	D	Female	None	Not Stated	Feces	17V10876-01.0003	10325	Crypto	Cryptosporidia present
2017-03-08 10:03:43	DHS Projects (DeBess)	OR	MULTNOMAH	PORTLAND	Feb Feral Cat #20	Cat	Adult 1-7	D	Female	None	Not Stated	Feces	17V10876-01.0004	6005	BAERMAN	No Lungworm Seen	No Lungworm Seen
2017-03-08 10:03:43	DHS Projects (DeBess)	OR	MULTNOMAH	PORTLAND	Feb Feral Cat #20	Cat	Adult 1-7	D	Female	None	Not Stated	Feces	17V10876-01.0004	10787	Fecal Sugar Centrifuge	No oocysts or eggs detected	No oocysts or eggs detected
2017-03-08 10:03:43	DHS Projects (DeBess)	OR	MULTNOMAH	PORTLAND	Feb Feral Cat #20	Cat	Adult 1-7	D	Female	None	Not Stated	Feces	17V10876-01.0004	10788	GIARDIA - FA Batch	Giardia - FA	Negative
2017-03-08 10:03:43	DHS Projects (DeBess)	OR	MULTNOMAH	PORTLAND	Feb Feral Cat #20	Cat	Adult 1-7	D	Female	None	Not Stated	Feces	17V10876-01.0004	10325	Crypto	No Cryptosporidia detected
2017-03-08 10:03:43	DHS Projects (DeBess)	OR	MULTNOMAH	PORTLAND	Feb Feral Cat #21	Cat	Adult 1-7	D	Male	None	Not Stated	Feces	17V10876-01.0005	6005	BAERMAN	No Lungworm Seen	No Lungworm Seen
2017-03-08 10:03:43	DHS Projects (DeBess)	OR	MULTNOMAH	PORTLAND	Feb Feral Cat #21	Cat	Adult 1-7	D	Male	None	Not Stated	Feces	17V10876-01.0005	10787	Fecal Sugar Centrifuge	No oocysts or eggs detected	No oocysts or eggs detected
2017-03-08 10:03:43	DHS Projects (DeBess)	OR	MULTNOMAH	PORTLAND	Feb Feral Cat #21	Cat	Adult 1-7	D	Male	None	Not Stated	Feces	17V10876-01.0005	10788	GIARDIA - FA Batch	Giardia - FA	Positive
2017-03-08 10:03:43	DHS Projects (DeBess)	OR	MULTNOMAH	PORTLAND	Feb Feral Cat #21	Cat	Adult 1-7	D	Male	None	Not Stated	Feces	17V10876-01.0005	10325	Crypto	Cryptosporidia present
2017-03-31 13:00:38	DHS Projects (DeBess)	OR	MULTNOMAH	PORTLAND	March 001 bette	Cat	15	Y	Female	None	None	Feces	17V12034-01.0001	6005	BAERMAN	No Lungworm Seen	No Lungworm Seen
2017-03-31 13:00:38	DHS Projects (DeBess)	OR	MULTNOMAH	PORTLAND	March 001 bette	Cat	15	Y	Female	None	None	Feces	17V12034-01.0001	10787	Fecal Sugar Centrifuge	No oocysts or eggs detected	No oocysts or eggs detected
2017-03-31 13:00:38	DHS Projects (DeBess)	OR	MULTNOMAH	PORTLAND	March 001 bette	Cat	15	Y	Female	None	None	Feces	17V12034-01.0001	10788	GIARDIA - FA Batch	Giardia - FA	Negative
2017-03-31 13:00:38	DHS Projects (DeBess)	OR	MULTNOMAH	PORTLAND	March 001 bette	Cat	15	Y	Female	None	None	Feces	17V12034-01.0001	10325	Crypto	No Cryptosporidia detected
2017-03-31 13:00:38	DHS Projects (DeBess)	OR	MULTNOMAH	PORTLAND	March 002 Bella	Cat	5	Y	Female	None	None	Feces	17V12034-01.0002	6005	BAERMAN	No Lungworm Seen	No Lungworm Seen
2017-03-31 13:00:38	DHS Projects (DeBess)	OR	MULTNOMAH	PORTLAND	March 002 Bella	Cat	5	Y	Female	None	None	Feces	17V12034-01.0002	10787	Fecal Sugar Centrifuge	No oocysts or eggs detected	No oocysts or eggs detected
2017-03-31 13:00:38	DHS Projects (DeBess)	OR	MULTNOMAH	PORTLAND	March 002 Bella	Cat	5	Y	Female	None	None	Feces	17V12034-01.0002	10788	GIARDIA - FA Batch	Giardia - FA	Negative
2017-03-31 13:00:38	DHS Projects (DeBess)	OR	MULTNOMAH	PORTLAND	March 002 Bella	Cat	5	Y	Female	None	None	Feces	17V12034-01.0002	10325	Crypto	No Cryptosporidia detected
2017-03-31 13:00:38	DHS Projects (DeBess)	OR	MULTNOMAH	PORTLAND	March 003 Kiki	Cat	5	Y	Male	None	None	Feces	17V12034-01.0003	6005	BAERMAN	No Lungworm Seen	No Lungworm Seen
2017-03-31 13:00:38	DHS Projects (DeBess)	OR	MULTNOMAH	PORTLAND	March 003 Kiki	Cat	5	Y	Male	None	None	Feces	17V12034-01.0003	10787	Fecal Sugar Centrifuge	Toxocara cati	Toxocara cati
2017-03-31 13:00:38	DHS Projects (DeBess)	OR	MULTNOMAH	PORTLAND	March 003 Kiki	Cat	5	Y	Male	None	None	Feces	17V12034-01.0003	10788	GIARDIA - FA Batch	Giardia - FA	Negative
2017-03-31 13:00:38	DHS Projects (DeBess)	OR	MULTNOMAH	PORTLAND	March 003 Kiki	Cat	5	Y	Male	None	None	Feces	17V12034-01.0003	10325	Crypto	No Cryptosporidia detected
2017-03-31 13:00:38	DHS Projects (DeBess)	OR	MULTNOMAH	PORTLAND	March 004 Sam	Cat	13	Y	Male	Advantage II	None	Feces	17V12034-01.0004	6005	BAERMAN	No Lungworm Seen	No Lungworm Seen
2017-03-31 13:00:38	DHS Projects (DeBess)	OR	MULTNOMAH	PORTLAND	March 004 Sam	Cat	13	Y	Male	Advantage II	None	Feces	17V12034-01.0004	10787	Fecal Sugar Centrifuge	No oocysts or eggs detected	No oocysts or eggs detected
2017-03-31 13:00:38	DHS Projects (DeBess)	OR	MULTNOMAH	PORTLAND	March 004 Sam	Cat	13	Y	Male	Advantage II	None	Feces	17V12034-01.0004	10788	GIARDIA - FA Batch	Giardia - FA	Negative
2017-03-31 13:00:38	DHS Projects (DeBess)	OR	MULTNOMAH	PORTLAND	March 004 Sam	Cat	13	Y	Male	Advantage II	None	Feces	17V12034-01.0004	10325	Crypto	No Cryptosporidia detected
2017-03-31 13:00:38	DHS Projects (DeBess)	OR	MULTNOMAH	PORTLAND	March 005 Max	Cat	14	Y	Male	Advantage II	None	Feces	17V12034-01.0005	6005	BAERMAN	No Lungworm Seen	No Lungworm Seen
2017-03-31 13:00:38	DHS Projects (DeBess)	OR	MULTNOMAH	PORTLAND	March 005 Max	Cat	14	Y	Male	Advantage II	None	Feces	17V12034-01.0005	10787	Fecal Sugar Centrifuge	No oocysts or eggs detected	No oocysts or eggs detected
2017-03-31 13:00:38	DHS Projects (DeBess)	OR	MULTNOMAH	PORTLAND	March 005 Max	Cat	14	Y	Male	Advantage II	None	Feces	17V12034-01.0005	10788	GIARDIA - FA Batch	Giardia - FA	Negative
2017-03-31 13:00:38	DHS Projects (DeBess)	OR	MULTNOMAH	PORTLAND	March 005 Max	Cat	14	Y	Male	Advantage II	None	Feces	17V12034-01.0005	10325	Crypto	No Cryptosporidia detected
2017-03-31 13:00:38	DHS Projects (DeBess)	OR	MULTNOMAH	PORTLAND	March 006 Boom boom	Cat	11	Y	Male	None	None	Feces	17V12034-01.0006	6005	BAERMAN	No Lungworm Seen	No Lungworm Seen
2017-03-31 13:00:38	DHS Projects (DeBess)	OR	MULTNOMAH	PORTLAND	March 006 Boom boom	Cat	11	Y	Male	None	None	Feces	17V12034-01.0006	10787	Fecal Sugar Centrifuge	No oocysts or eggs detected	No oocysts or eggs detected
2017-03-31 13:00:38	DHS Projects (DeBess)	OR	MULTNOMAH	PORTLAND	March 006 Boom boom	Cat	11	Y	Male	None	None	Feces	17V12034-01.0006	10788	GIARDIA - FA Batch	Giardia - FA	Positive
2017-03-31 13:00:38	DHS Projects (DeBess)	OR	MULTNOMAH	PORTLAND	March 006 Boom boom	Cat	11	Y	Male	None	None	Feces	17V12034-01.0006	10325	Crypto	Cryptosporidia present
2017-03-31 13:00:38	DHS Projects (DeBess)	OR	MULTNOMAH	PORTLAND	March 007 Fern	Cat	3	Y	Female	None	None	Feces	17V12034-01.0007	6005	BAERMAN	Lungworm larvae present	Lungworm larvae present Aelurostrongylus
2017-03-31 13:00:38	DHS Projects (DeBess)	OR	MULTNOMAH	PORTLAND	March 007 Fern	Cat	3	Y	Female	None	None	Feces	17V12034-01.0007	10787	Fecal Sugar Centrifuge	No oocysts or eggs detected	No oocysts or eggs detected
2017-03-31 13:00:38	DHS Projects (DeBess)	OR	MULTNOMAH	PORTLAND	March 007 Fern	Cat	3	Y	Female	None	None	Feces	17V12034-01.0007	10788	GIARDIA - FA Batch	Giardia - FA	Positive
2017-03-31 13:00:38	DHS Projects (DeBess)	OR	MULTNOMAH	PORTLAND	March 007 Fern	Cat	3	Y	Female	None	None	Feces	17V12034-01.0007	10325	Crypto	No Cryptosporidia detected
2017-04-06 10:20:11	DHS Projects (DeBess)	OR	MULTNOMAH	PORTLAND	March008 Lloyd	Cat	4	Y	Male	Not Stated	Not Stated	Feces	17V12256-01.0001	6005	BAERMAN	No Lungworm Seen	No Lungworm Seen
2017-04-06 10:20:11	DHS Projects (DeBess)	OR	MULTNOMAH	PORTLAND	March008 Lloyd	Cat	4	Y	Male	Not Stated	Not Stated	Feces	17V12256-01.0001	10787	Fecal Sugar Centrifuge	Toxocara cati	Toxocara cati
2017-04-06 10:20:11	DHS Projects (DeBess)	OR	MULTNOMAH	PORTLAND	March008 Lloyd	Cat	4	Y	Male	Not Stated	Not Stated	Feces	17V12256-01.0001	10788	GIARDIA - FA Batch	Giardia - FA	Negative
2017-04-06 10:20:11	DHS Projects (DeBess)	OR	MULTNOMAH	PORTLAND	March008 Lloyd	Cat	4	Y	Male	Not Stated	Not Stated	Feces	17V12256-01.0001	10325	Crypto	No Cryptosporidia detected
2017-04-06 10:20:11	DHS Projects (DeBess)	OR	MULTNOMAH	PORTLAND	March009 Sake	Cat	4	Y	Male	Not Stated	Not Stated	Feces	17V12256-01.0002	6005	BAERMAN	Lungworm larvae present	Lungworm larvae present Aelurostrongylus.
2017-04-06 10:20:11	DHS Projects (DeBess)	OR	MULTNOMAH	PORTLAND	March009 Sake	Cat	4	Y	Male	Not Stated	Not Stated	Feces	17V12256-01.0002	10787	Fecal Sugar Centrifuge	No oocysts or eggs detected	No oocysts or eggs detected
2017-04-06 10:20:11	DHS Projects (DeBess)	OR	MULTNOMAH	PORTLAND	March009 Sake	Cat	4	Y	Male	Not Stated	Not Stated	Feces	17V12256-01.0002	10788	GIARDIA - FA Batch	Giardia - FA	Negative
2017-04-06 10:20:11	DHS Projects (DeBess)	OR	MULTNOMAH	PORTLAND	March009 Sake	Cat	4	Y	Male	Not Stated	Not Stated	Feces	17V12256-01.0002	10325	Crypto	Cryptosporidia present
2017-04-06 10:20:11	DHS Projects (DeBess)	OR	MULTNOMAH	PORTLAND	March010 Mulan	Cat	9	Y	Female	None	Not Stated	Feces	17V12256-01.0003	6005	BAERMAN	No Lungworm Seen	No Lungworm Seen
2017-04-06 10:20:11	DHS Projects (DeBess)	OR	MULTNOMAH	PORTLAND	March010 Mulan	Cat	9	Y	Female	None	Not Stated	Feces	17V12256-01.0003	10787	Fecal Sugar Centrifuge	No oocysts or eggs detected	No oocysts or eggs detected
2017-04-06 10:20:11	DHS Projects (DeBess)	OR	MULTNOMAH	PORTLAND	March010 Mulan	Cat	9	Y	Female	None	Not Stated	Feces	17V12256-01.0003	10788	GIARDIA - FA Batch	Giardia - FA	Negative
2017-04-06 10:20:11	DHS Projects (DeBess)	OR	MULTNOMAH	PORTLAND	March010 Mulan	Cat	9	Y	Female	None	Not Stated	Feces	17V12256-01.0003	10325	Crypto	No Cryptosporidia detected
2017-04-06 10:20:11	DHS Projects (DeBess)	OR	MULTNOMAH	PORTLAND	March011 Oliver	Cat	1	Y	Male	Not Stated	Not Stated	Feces	17V12256-01.0004	6005	BAERMAN	No Lungworm Seen	No Lungworm Seen
2017-04-06 10:20:11	DHS Projects (DeBess)	OR	MULTNOMAH	PORTLAND	March011 Oliver	Cat	1	Y	Male	Not Stated	Not Stated	Feces	17V12256-01.0004	10787	Fecal Sugar Centrifuge	No oocysts or eggs detected	No oocysts or eggs detected
2017-04-06 10:20:11	DHS Projects (DeBess)	OR	MULTNOMAH	PORTLAND	March011 Oliver	Cat	1	Y	Male	Not Stated	Not Stated	Feces	17V12256-01.0004	10788	GIARDIA - FA Batch	Giardia - FA	Positive
2017-04-06 10:20:11	DHS Projects (DeBess)	OR	MULTNOMAH	PORTLAND	March011 Oliver	Cat	1	Y	Male	Not Stated	Not Stated	Feces	17V12256-01.0004	10325	Crypto	No Cryptosporidia detected
2017-04-06 10:20:11	DHS Projects (DeBess)	OR	MULTNOMAH	PORTLAND	March012 Wheels	Cat	3	Y	Female	Not Stated	Not Stated	Feces	17V12256-01.0005	6005	BAERMAN	No Lungworm Seen	No Lungworm Seen
2017-04-06 10:20:11	DHS Projects (DeBess)	OR	MULTNOMAH	PORTLAND	March012 Wheels	Cat	3	Y	Female	Not Stated	Not Stated	Feces	17V12256-01.0005	10787	Fecal Sugar Centrifuge	No oocysts or eggs detected	No oocysts or eggs detected
2017-04-06 10:20:11	DHS Projects (DeBess)	OR	MULTNOMAH	PORTLAND	March012 Wheels	Cat	3	Y	Female	Not Stated	Not Stated	Feces	17V12256-01.0005	10788	GIARDIA - FA Batch	Giardia - FA	Negative
2017-04-06 10:20:11	DHS Projects (DeBess)	OR	MULTNOMAH	PORTLAND	March012 Wheels	Cat	3	Y	Female	Not Stated	Not Stated	Feces	17V12256-01.0005	10325	Crypto	No Cryptosporidia detected
2017-04-06 10:20:11	DHS Projects (DeBess)	OR	MULTNOMAH	PORTLAND	March013 Chevy	Cat	12	Y	Male	Not Stated	Not Stated	Feces	17V12256-01.0006	6005	BAERMAN	No Lungworm Seen	No Lungworm Seen
2017-04-06 10:20:11	DHS Projects (DeBess)	OR	MULTNOMAH	PORTLAND	March013 Chevy	Cat	12	Y	Male	Not Stated	Not Stated	Feces	17V12256-01.0006	10787	Fecal Sugar Centrifuge	No oocysts or eggs detected	No oocysts or eggs detected
2017-04-06 10:20:11	DHS Projects (DeBess)	OR	MULTNOMAH	PORTLAND	March013 Chevy	Cat	12	Y	Male	Not Stated	Not Stated	Feces	17V12256-01.0006	10788	GIARDIA - FA Batch	Giardia - FA	Negative
2017-04-06 10:20:11	DHS Projects (DeBess)	OR	MULTNOMAH	PORTLAND	March013 Chevy	Cat	12	Y	Male	Not Stated	Not Stated	Feces	17V12256-01.0006	10325	Crypto	Cryptosporidia present
2017-04-06 10:20:11	DHS Projects (DeBess)	OR	MULTNOMAH	PORTLAND	March014 Blackie	Cat	4	Y	Male	Not Stated	Not Stated	Feces	17V12256-01.0007	6005	BAERMAN	No Lungworm Seen	No Lungworm Seen
2017-04-06 10:20:11	DHS Projects (DeBess)	OR	MULTNOMAH	PORTLAND	March014 Blackie	Cat	4	Y	Male	Not Stated	Not Stated	Feces	17V12256-01.0007	10787	Fecal Sugar Centrifuge	Toxocara cati	Toxocara cati
2017-04-06 10:20:11	DHS Projects (DeBess)	OR	MULTNOMAH	PORTLAND	March014 Blackie	Cat	4	Y	Male	Not Stated	Not Stated	Feces	17V12256-01.0007	10788	GIARDIA - FA Batch	Giardia - FA	Negative
2017-04-06 10:20:11	DHS Projects (DeBess)	OR	MULTNOMAH	PORTLAND	March014 Blackie	Cat	4	Y	Male	Not Stated	Not Stated	Feces	17V12256-01.0007	10325	Crypto	No Cryptosporidia detected
2017-04-06 10:20:11	DHS Projects (DeBess)	OR	MULTNOMAH	PORTLAND	March015 Ace	Cat	8	Y	Male	Not Stated	Not Stated	Feces	17V12256-01.0008	6005	BAERMAN	No Lungworm Seen	No Lungworm Seen
2017-04-06 10:20:11	DHS Projects (DeBess)	OR	MULTNOMAH	PORTLAND	March015 Ace	Cat	8	Y	Male	Not Stated	Not Stated	Feces	17V12256-01.0008	10787	Fecal Sugar Centrifuge	No oocysts or eggs detected	No oocysts or eggs detected
2017-04-06 10:20:11	DHS Projects (DeBess)	OR	MULTNOMAH	PORTLAND	March015 Ace	Cat	8	Y	Male	Not Stated	Not Stated	Feces	17V12256-01.0008	10788	GIARDIA - FA Batch	Giardia - FA	Negative
2017-04-06 10:20:11	DHS Projects (DeBess)	OR	MULTNOMAH	PORTLAND	March015 Ace	Cat	8	Y	Male	Not Stated	Not Stated	Feces	17V12256-01.0008	10325	Crypto	Cryptosporidia present
2017-04-14 10:07:15	DHS Projects (DeBess)	OR	MULTNOMAH	PORTLAND	001 Puffin	Domestic Mediumhaired Cat	9	Y	Male	Frontline	None	Feces	17V12649-01.0001	6005	BAERMAN	Lungworm larvae present, Aelurostrongylus spp observed	Lungworm larvae present, Aelurostrongylus spp observed
2017-04-14 10:07:15	DHS Projects (DeBess)	OR	MULTNOMAH		001 Puffin	Domestic Mediumhaired Cat	9	Y	Male	Frontline	None	Feces	17V12649-01.0001	10787	Fecal Sugar Centrifuge	No oocysts or eggs detected	No oocysts or eggs detected
2017-04-14 10:07:15	DHS Projects (DeBess)	OR	MULTNOMAH		001 Puffin	Domestic Mediumhaired Cat	9	Y	Male	Frontline	None	Feces	17V12649-01.0001	10788	GIARDIA - FA Batch	Giardia - FA	Negative
2017-04-14 10:07:15	DHS Projects (DeBess)	OR	MULTNOMAH		001 Puffin	Domestic Mediumhaired Cat	9	Y	Male	Frontline	None	Feces	17V12649-01.0001	10325	Crypto	Cryptosporidia present
2017-04-14 10:07:15	DHS Projects (DeBess)	OR	MULTNOMAH	PORTLAND	002 Georgie	Cat	9	Y	Male	None	Not Stated	Feces	17V12649-01.0002	6005	BAERMAN	No Lungworm larvae observed	No Lungworm larvae observed
2017-04-14 10:07:15	DHS Projects (DeBess)	OR	MULTNOMAH		002 Georgie	Cat	9	Y	Male	None	Not Stated	Feces	17V12649-01.0002	10787	Fecal Sugar Centrifuge	Toxocara cati	Toxocara cati
2017-04-14 10:07:15	DHS Projects (DeBess)	OR	MULTNOMAH		002 Georgie	Cat	9	Y	Male	None	Not Stated	Feces	17V12649-01.0002	10788	GIARDIA - FA Batch	Giardia - FA	Negative
2017-04-14 10:07:15	DHS Projects (DeBess)	OR	MULTNOMAH		002 Georgie	Cat	9	Y	Male	None	Not Stated	Feces	17V12649-01.0002	10325	Crypto	No Cryptosporidia detected
2017-04-14 10:07:15	DHS Projects (DeBess)	OR	MULTNOMAH	PORTLAND	003 Jezza	Domestic Shorthaired Cat	4	Y	Female	None	Not Stated	Feces	17V12649-01.0003	6005	BAERMAN	Lungworm larvae present, Aelurostrongylus spp observed	Lungworm larvae present, Aelurostrongylus spp observed
2017-04-14 10:07:15	DHS Projects (DeBess)	OR	MULTNOMAH		003 Jezza	Domestic Shorthaired Cat	4	Y	Female	None	Not Stated	Feces	17V12649-01.0003	10787	Fecal Sugar Centrifuge	No oocysts or eggs detected	No oocysts or eggs detected
2017-04-14 10:07:15	DHS Projects (DeBess)	OR	MULTNOMAH		003 Jezza	Domestic Shorthaired Cat	4	Y	Female	None	Not Stated	Feces	17V12649-01.0003	10788	GIARDIA - FA Batch	Giardia - FA	Negative
2017-04-14 10:07:15	DHS Projects (DeBess)	OR	MULTNOMAH		003 Jezza	Domestic Shorthaired Cat	4	Y	Female	None	Not Stated	Feces	17V12649-01.0003	10325	Crypto	No Cryptosporidia detected
2017-04-14 10:07:15	DHS Projects (DeBess)	OR	MULTNOMAH	PORTLAND	004 #19	Cat	7	Y	Female	None	Not Stated	Feces	17V12649-01.0004	6005	BAERMAN	No Lungworm larvae observed	No Lungworm larvae observed
2017-04-14 10:07:15	DHS Projects (DeBess)	OR	MULTNOMAH		004 #19	Cat	7	Y	Female	None	Not Stated	Feces	17V12649-01.0004	10787	Fecal Sugar Centrifuge	No oocysts or eggs detected	No oocysts or eggs detected
2017-04-14 10:07:15	DHS Projects (DeBess)	OR	MULTNOMAH		004 #19	Cat	7	Y	Female	None	Not Stated	Feces	17V12649-01.0004	10788	GIARDIA - FA Batch	Giardia - FA	Negative
2017-04-14 10:07:15	DHS Projects (DeBess)	OR	MULTNOMAH		004 #19	Cat	7	Y	Female	None	Not Stated	Feces	17V12649-01.0004	10325	Crypto	Cryptosporidia present
2017-04-14 10:07:15	DHS Projects (DeBess)	OR	MULTNOMAH	PORTLAND	005 #23	Cat	9	Y	Male	None	Not Stated	Feces	17V12649-01.0005	6005	BAERMAN	No Lungworm larvae observed	No Lungworm larvae observed
2017-04-14 10:07:15	DHS Projects (DeBess)	OR	MULTNOMAH		005 #23	Cat	9	Y	Male	None	Not Stated	Feces	17V12649-01.0005	10787	Fecal Sugar Centrifuge	No oocysts or eggs detected	No oocysts or eggs detected
2017-04-14 10:07:15	DHS Projects (DeBess)	OR	MULTNOMAH		005 #23	Cat	9	Y	Male	None	Not Stated	Feces	17V12649-01.0005	10788	GIARDIA - FA Batch	Giardia - FA	Negative
2017-04-14 10:07:15	DHS Projects (DeBess)	OR	MULTNOMAH		005 #23	Cat	9	Y	Male	None	Not Stated	Feces	17V12649-01.0005	10325	Crypto	No Cryptosporidia detected
2017-04-14 10:07:15	DHS Projects (DeBess)	OR	MULTNOMAH	PORTLAND	006 #10	Cat	5	Y	Male	None	Not Stated	Feces	17V12649-01.0006	6005	BAERMAN	No Lungworm larvae observed	No Lungworm larvae observed
2017-04-14 10:07:15	DHS Projects (DeBess)	OR	MULTNOMAH		006 #10	Cat	5	Y	Male	None	Not Stated	Feces	17V12649-01.0006	10787	Fecal Sugar Centrifuge	No oocysts or eggs detected	No oocysts or eggs detected
2017-04-14 10:07:15	DHS Projects (DeBess)	OR	MULTNOMAH		006 #10	Cat	5	Y	Male	None	Not Stated	Feces	17V12649-01.0006	10788	GIARDIA - FA Batch	Giardia - FA	Negative
2017-04-14 10:07:15	DHS Projects (DeBess)	OR	MULTNOMAH		006 #10	Cat	5	Y	Male	None	Not Stated	Feces	17V12649-01.0006	10325	Crypto	No Cryptosporidia detected
2017-04-14 10:07:15	DHS Projects (DeBess)	OR	MULTNOMAH	PORTLAND	007 #16	Cat	6	Y	Male	None	Not Stated	Feces	17V12649-01.0007	6005	BAERMAN	Lungworm larvae present, Aelurostrongylus spp observed	Lungworm larvae present, Aelurostrongylus spp observed
2017-04-14 10:07:15	DHS Projects (DeBess)	OR	MULTNOMAH		007 #16	Cat	6	Y	Male	None	Not Stated	Feces	17V12649-01.0007	10787	Fecal Sugar Centrifuge	No oocysts or eggs detected	No oocysts or eggs detected
2017-04-14 10:07:15	DHS Projects (DeBess)	OR	MULTNOMAH		007 #16	Cat	6	Y	Male	None	Not Stated	Feces	17V12649-01.0007	10788	GIARDIA - FA Batch	Giardia - FA	Positive
2017-04-14 10:07:15	DHS Projects (DeBess)	OR	MULTNOMAH		007 #16	Cat	6	Y	Male	None	Not Stated	Feces	17V12649-01.0007	10325	Crypto	Cryptosporidia present
2017-04-26 11:14:32	DHS Projects (DeBess)	OR	MULTNOMAH	PORTLAND	Lucky	Cat	2	Y	Male	Not Stated	Not Stated	Feces	17V13198-01.0001	6005	BAERMAN	No Lungworm larvae observed	No Lungworm larvae observed
2017-04-26 11:14:32	DHS Projects (DeBess)	OR	MULTNOMAH	PORTLAND	Lucky	Cat	2	Y	Male	Not Stated	Not Stated	Feces	17V13198-01.0001	10787	Fecal Sugar Centrifuge	No oocysts or eggs detected	No oocysts or eggs detected
2017-04-26 11:14:32	DHS Projects (DeBess)	OR	MULTNOMAH	PORTLAND	Lucky	Cat	2	Y	Male	Not Stated	Not Stated	Feces	17V13198-01.0001	6014	CRYPTO	No Cryptosporidia detected	No Cryptosporidia detected
2017-04-26 11:14:32	DHS Projects (DeBess)	OR	MULTNOMAH	PORTLAND	Lucky	Cat	2	Y	Male	Not Stated	Not Stated	Feces	17V13198-01.0001	10983	Giardia - FA	No Giardia detected	No Giardia detected
2017-05-03 11:15:31	DHS Projects (DeBess)	OR	MULTNOMAH	PORTLAND	Cleo April 009	Domestic Shorthaired Cat	8	Y	Female	None	Not Stated	Feces	17V13524-01.0001	6005	BAERMAN	No Lungworm larvae observed	No Lungworm larvae observed
2017-05-03 11:15:31	DHS Projects (DeBess)	OR	MULTNOMAH	PORTLAND	Cleo April 009	Domestic Shorthaired Cat	8	Y	Female	None	Not Stated	Feces	17V13524-01.0001	10787	Fecal Sugar Centrifuge	No oocysts or eggs detected	No oocysts or eggs detected
2017-05-03 11:15:31	DHS Projects (DeBess)	OR	MULTNOMAH	PORTLAND	Cleo April 009	Domestic Shorthaired Cat	8	Y	Female	None	Not Stated	Feces	17V13524-01.0001	10788	GIARDIA - FA Batch	Giardia - FA	Negative
2017-05-03 11:15:31	DHS Projects (DeBess)	OR	MULTNOMAH	PORTLAND	Cleo April 009	Domestic Shorthaired Cat	8	Y	Female	None	Not Stated	Feces	17V13524-01.0001	10325	Crypto	No Cryptosporidia detected
2017-05-03 11:15:31	DHS Projects (DeBess)	OR	MULTNOMAH	PORTLAND	Ramona April 010	Maine Coon	7	Y	Female	None	Not Stated	Feces	17V13524-02.0001	6005	BAERMAN	No Lungworm larvae observed	No Lungworm larvae observed
2017-05-03 11:15:31	DHS Projects (DeBess)	OR	MULTNOMAH	PORTLAND	Ramona April 010	Maine Coon	7	Y	Female	None	Not Stated	Feces	17V13524-02.0001	10787	Fecal Sugar Centrifuge	No oocysts or eggs detected	No oocysts or eggs detected
2017-05-03 11:15:31	DHS Projects (DeBess)	OR	MULTNOMAH	PORTLAND	Ramona April 010	Maine Coon	7	Y	Female	None	Not Stated	Feces	17V13524-02.0001	10788	GIARDIA - FA Batch	Giardia - FA	Positive
2017-05-03 11:15:31	DHS Projects (DeBess)	OR	MULTNOMAH	PORTLAND	Ramona April 010	Maine Coon	7	Y	Female	None	Not Stated	Feces	17V13524-02.0001	10325	Crypto	No Cryptosporidia detected
2017-05-03 11:15:31	DHS Projects (DeBess)	OR	MULTNOMAH	PORTLAND	Solobino April 011	Domestic Shorthaired Cat	14	Y	Female	None	Not Stated	Feces	17V13524-03.0001	6005	BAERMAN	No Lungworm larvae observed	No Lungworm larvae observed
2017-05-03 11:15:31	DHS Projects (DeBess)	OR	MULTNOMAH	PORTLAND	Solobino April 011	Domestic Shorthaired Cat	14	Y	Female	None	Not Stated	Feces	17V13524-03.0001	10787	Fecal Sugar Centrifuge	No oocysts or eggs detected	No oocysts or eggs detected
2017-05-03 11:15:31	DHS Projects (DeBess)	OR	MULTNOMAH	PORTLAND	Solobino April 011	Domestic Shorthaired Cat	14	Y	Female	None	Not Stated	Feces	17V13524-03.0001	10788	GIARDIA - FA Batch	Giardia - FA	Negative
2017-05-03 11:15:31	DHS Projects (DeBess)	OR	MULTNOMAH	PORTLAND	Solobino April 011	Domestic Shorthaired Cat	14	Y	Female	None	Not Stated	Feces	17V13524-03.0001	10325	Crypto	No Cryptosporidia detected
2017-05-24 10:01:51	DHS Projects (DeBess)	OR	MULTNOMAH	PORTLAND	May 001 Freya	Domestic Longhaired Cat	19	Y	Female	None	Not Stated	Feces	17V14497-01.0001	6005	BAERMAN	No Lungworm larvae observed	No Lungworm larvae observed
2017-05-24 10:01:51	DHS Projects (DeBess)	OR	MULTNOMAH	PORTLAND	May 001 Freya	Domestic Longhaired Cat	19	Y	Female	None	Not Stated	Feces	17V14497-01.0001	10787	Fecal Sugar Centrifuge	No oocysts or eggs detected	No oocysts or eggs detected
2017-05-24 10:01:51	DHS Projects (DeBess)	OR	MULTNOMAH	PORTLAND	May 001 Freya	Domestic Longhaired Cat	19	Y	Female	None	Not Stated	Feces	17V14497-01.0001	6014	CRYPTO	No Cryptosporidia detected	No Cryptosporidia detected
2017-05-24 10:01:51	DHS Projects (DeBess)	OR	MULTNOMAH	PORTLAND	May 001 Freya	Domestic Longhaired Cat	19	Y	Female	None	Not Stated	Feces	17V14497-01.0001	10983	Giardia - FA	No Giardia detected	No Giardia detected
2017-05-24 10:01:51	DHS Projects (DeBess)	OR	MULTNOMAH	PORTLAND	May 002 Syrah	Cat	11	Y	Female	Not Stated	Not Stated	Feces	17V14497-01.0002	6005	BAERMAN	No Lungworm larvae observed	No Lungworm larvae observed
2017-05-24 10:01:51	DHS Projects (DeBess)	OR	MULTNOMAH	PORTLAND	May 002 Syrah	Cat	11	Y	Female	Not Stated	Not Stated	Feces	17V14497-01.0002	10787	Fecal Sugar Centrifuge	Toxocara cati	Toxocara cati
2017-05-24 10:01:51	DHS Projects (DeBess)	OR	MULTNOMAH	PORTLAND	May 002 Syrah	Cat	11	Y	Female	Not Stated	Not Stated	Feces	17V14497-01.0002	6014	CRYPTO	No Cryptosporidia detected	No Cryptosporidia detected
2017-05-24 10:01:51	DHS Projects (DeBess)	OR	MULTNOMAH	PORTLAND	May 002 Syrah	Cat	11	Y	Female	Not Stated	Not Stated	Feces	17V14497-01.0002	10983	Giardia - FA	No Giardia detected	No Giardia detected
2017-05-24 10:01:51	DHS Projects (DeBess)	OR	MULTNOMAH	PORTLAND	May 003 meow	Cat	15	Y	Female	Not Stated	Not Stated	Feces	17V14497-01.0003	6005	BAERMAN	No Lungworm larvae observed	No Lungworm larvae observed
2017-05-24 10:01:51	DHS Projects (DeBess)	OR	MULTNOMAH	PORTLAND	May 003 meow	Cat	15	Y	Female	Not Stated	Not Stated	Feces	17V14497-01.0003	10787	Fecal Sugar Centrifuge	No oocysts or eggs detected	No oocysts or eggs detected
2017-05-24 10:01:51	DHS Projects (DeBess)	OR	MULTNOMAH	PORTLAND	May 003 meow	Cat	15	Y	Female	Not Stated	Not Stated	Feces	17V14497-01.0003	6014	CRYPTO	No Cryptosporidia detected	No Cryptosporidia detected
2017-05-24 10:01:51	DHS Projects (DeBess)	OR	MULTNOMAH	PORTLAND	May 003 meow	Cat	15	Y	Female	Not Stated	Not Stated	Feces	17V14497-01.0003	10983	Giardia - FA	No Giardia detected	No Giardia detected
2017-05-24 10:01:51	DHS Projects (DeBess)	OR	MULTNOMAH	PORTLAND	May 004 tiger lily	Cat	4	Y	Female	Not Stated	Not Stated	Feces	17V14497-01.0004	6005	BAERMAN	Lungworm larvae present, Aelurostrongylus spp observed	Lungworm larvae present, Aelurostrongylus spp observed
2017-05-24 10:01:51	DHS Projects (DeBess)	OR	MULTNOMAH	PORTLAND	May 004 tiger lily	Cat	4	Y	Female	Not Stated	Not Stated	Feces	17V14497-01.0004	10787	Fecal Sugar Centrifuge	No oocysts or eggs detected	No oocysts or eggs detected
2017-05-24 10:01:51	DHS Projects (DeBess)	OR	MULTNOMAH	PORTLAND	May 004 tiger lily	Cat	4	Y	Female	Not Stated	Not Stated	Feces	17V14497-01.0004	6014	CRYPTO	Cryptosporidia present	Cryptosporidia present - Sm #
2017-05-24 10:01:51	DHS Projects (DeBess)	OR	MULTNOMAH	PORTLAND	May 004 tiger lily	Cat	4	Y	Female	Not Stated	Not Stated	Feces	17V14497-01.0004	10983	Giardia - FA	No Giardia detected	No Giardia detected
2017-05-24 10:01:51	DHS Projects (DeBess)	OR	MULTNOMAH	PORTLAND	May 005 Pickles	Cat	7	Y	Female	Not Stated	Not Stated	Feces	17V14497-01.0005	6005	BAERMAN	No Lungworm larvae observed	No Lungworm larvae observed
2017-05-24 10:01:51	DHS Projects (DeBess)	OR	MULTNOMAH	PORTLAND	May 005 Pickles	Cat	7	Y	Female	Not Stated	Not Stated	Feces	17V14497-01.0005	10787	Fecal Sugar Centrifuge	No oocysts or eggs detected	No oocysts or eggs detected
2017-05-24 10:01:51	DHS Projects (DeBess)	OR	MULTNOMAH	PORTLAND	May 005 Pickles	Cat	7	Y	Female	Not Stated	Not Stated	Feces	17V14497-01.0005	6014	CRYPTO	No Cryptosporidia detected	No Cryptosporidia detected
2017-05-24 10:01:51	DHS Projects (DeBess)	OR	MULTNOMAH	PORTLAND	May 005 Pickles	Cat	7	Y	Female	Not Stated	Not Stated	Feces	17V14497-01.0005	10983	Giardia - FA	No Giardia detected	No Giardia detected
2017-06-01 11:04:22	DHS Projects (DeBess)	OR	MULTNOMAH	PORTLAND	May 006 34 FeralCat	Cat	Adult 1-7	D	Female	Not Stated	Not Stated	Feces	17V14821-01.0001	6005	BAERMAN	No Lungworm larvae observed	No Lungworm larvae observed
2017-06-01 11:04:22	DHS Projects (DeBess)	OR	MULTNOMAH	PORTLAND	May 006 34 FeralCat	Cat	Adult 1-7	D	Female	Not Stated	Not Stated	Feces	17V14821-01.0001	10787	Fecal Sugar Centrifuge	Toxocara cati	Toxocara cati
2017-06-01 11:04:22	DHS Projects (DeBess)	OR	MULTNOMAH	PORTLAND	May 006 34 FeralCat	Cat	Adult 1-7	D	Female	Not Stated	Not Stated	Feces	17V14821-01.0001	10787	Fecal Sugar Centrifuge	Ancyclostoma caninum	Ancyclostoma caninum
2017-06-01 11:04:22	DHS Projects (DeBess)	OR	MULTNOMAH	PORTLAND	May 006 34 FeralCat	Cat	Adult 1-7	D	Female	Not Stated	Not Stated	Feces	17V14821-01.0001	10788	GIARDIA - FA Batch	Giardia - FA	Negative
2017-06-01 11:04:22	DHS Projects (DeBess)	OR	MULTNOMAH	PORTLAND	May 006 34 FeralCat	Cat	Adult 1-7	D	Female	Not Stated	Not Stated	Feces	17V14821-01.0001	10325	Crypto	Cryptosporidia present - Sm #
2017-06-01 11:04:22	DHS Projects (DeBess)	OR	MULTNOMAH	PORTLAND	May 007 10 Feral cat	Cat	Adult 1-7	D	Female	Not Stated	Not Stated	Feces	17V14821-01.0002	6005	BAERMAN	No Lungworm larvae observed	No Lungworm larvae observed
2017-06-01 11:04:22	DHS Projects (DeBess)	OR	MULTNOMAH	PORTLAND	May 007 10 Feral cat	Cat	Adult 1-7	D	Female	Not Stated	Not Stated	Feces	17V14821-01.0002	10787	Fecal Sugar Centrifuge	Toxocara cati	Toxocara cati
2017-06-01 11:04:22	DHS Projects (DeBess)	OR	MULTNOMAH	PORTLAND	May 007 10 Feral cat	Cat	Adult 1-7	D	Female	Not Stated	Not Stated	Feces	17V14821-01.0002	10788	GIARDIA - FA Batch	Giardia - FA	Negative
2017-06-01 11:04:22	DHS Projects (DeBess)	OR	MULTNOMAH	PORTLAND	May 007 10 Feral cat	Cat	Adult 1-7	D	Female	Not Stated	Not Stated	Feces	17V14821-01.0002	10325	Crypto	No Cryptosporidia detected
2017-06-01 11:04:22	DHS Projects (DeBess)	OR	MULTNOMAH	PORTLAND	May 008 8 Feral cat	Cat	Adult 1-7	D	Female	Not Stated	Not Stated	Feces	17V14821-01.0003	6005	BAERMAN	No Lungworm larvae observed	No Lungworm larvae observed
2017-06-01 11:04:22	DHS Projects (DeBess)	OR	MULTNOMAH	PORTLAND	May 008 8 Feral cat	Cat	Adult 1-7	D	Female	Not Stated	Not Stated	Feces	17V14821-01.0003	10787	Fecal Sugar Centrifuge	Paragonimus kellicotti	Paragonimus kellicotti
2017-06-01 11:04:22	DHS Projects (DeBess)	OR	MULTNOMAH	PORTLAND	May 008 8 Feral cat	Cat	Adult 1-7	D	Female	Not Stated	Not Stated	Feces	17V14821-01.0003	10787	Fecal Sugar Centrifuge	Capillaria sp.	Capillaria sp.
2017-06-01 11:04:22	DHS Projects (DeBess)	OR	MULTNOMAH	PORTLAND	May 008 8 Feral cat	Cat	Adult 1-7	D	Female	Not Stated	Not Stated	Feces	17V14821-01.0003	10788	GIARDIA - FA Batch	Giardia - FA	Negative
2017-06-01 11:04:22	DHS Projects (DeBess)	OR	MULTNOMAH	PORTLAND	May 008 8 Feral cat	Cat	Adult 1-7	D	Female	Not Stated	Not Stated	Feces	17V14821-01.0003	10325	Crypto	Cryptosporidia present - Sm #
2017-06-01 11:04:22	DHS Projects (DeBess)	OR	MULTNOMAH	PORTLAND	May 009 5 Feral cat	Cat	Adult 1-7	D	Female	Not Stated	Not Stated	Feces	17V14821-01.0004	6005	BAERMAN	No Lungworm larvae observed	No Lungworm larvae observed
2017-06-01 11:04:22	DHS Projects (DeBess)	OR	MULTNOMAH	PORTLAND	May 009 5 Feral cat	Cat	Adult 1-7	D	Female	Not Stated	Not Stated	Feces	17V14821-01.0004	10787	Fecal Sugar Centrifuge	Isospora	Isospora
2017-06-01 11:04:22	DHS Projects (DeBess)	OR	MULTNOMAH	PORTLAND	May 009 5 Feral cat	Cat	Adult 1-7	D	Female	Not Stated	Not Stated	Feces	17V14821-01.0004	10787	Fecal Sugar Centrifuge	Toxocara cati	Toxocara cati
2017-06-01 11:04:22	DHS Projects (DeBess)	OR	MULTNOMAH	PORTLAND	May 009 5 Feral cat	Cat	Adult 1-7	D	Female	Not Stated	Not Stated	Feces	17V14821-01.0004	10787	Fecal Sugar Centrifuge	Taenia sp.	Taenia sp.
2017-06-01 11:04:22	DHS Projects (DeBess)	OR	MULTNOMAH	PORTLAND	May 009 5 Feral cat	Cat	Adult 1-7	D	Female	Not Stated	Not Stated	Feces	17V14821-01.0004	10788	GIARDIA - FA Batch	Giardia - FA	Negative
2017-06-01 11:04:22	DHS Projects (DeBess)	OR	MULTNOMAH	PORTLAND	May 009 5 Feral cat	Cat	Adult 1-7	D	Female	Not Stated	Not Stated	Feces	17V14821-01.0004	10325	Crypto	No Cryptosporidia detected
2017-06-01 11:04:22	DHS Projects (DeBess)	OR	MULTNOMAH	PORTLAND	May 010 12 Feral cat	Cat	Adult 1-7	D	Male	Not Stated	Not Stated	Feces	17V14821-01.0005	6005	BAERMAN	No Lungworm larvae observed	No Lungworm larvae observed
2017-06-01 11:04:22	DHS Projects (DeBess)	OR	MULTNOMAH	PORTLAND	May 010 12 Feral cat	Cat	Adult 1-7	D	Male	Not Stated	Not Stated	Feces	17V14821-01.0005	10787	Fecal Sugar Centrifuge	Toxocara cati	Toxocara cati
2017-06-01 11:04:22	DHS Projects (DeBess)	OR	MULTNOMAH	PORTLAND	May 010 12 Feral cat	Cat	Adult 1-7	D	Male	Not Stated	Not Stated	Feces	17V14821-01.0005	10788	GIARDIA - FA Batch	Giardia - FA	Negative
2017-06-01 11:04:22	DHS Projects (DeBess)	OR	MULTNOMAH	PORTLAND	May 010 12 Feral cat	Cat	Adult 1-7	D	Male	Not Stated	Not Stated	Feces	17V14821-01.0005	10325	Crypto	No Cryptosporidia detected
2017-06-01 11:04:22	DHS Projects (DeBess)	OR	MULTNOMAH	PORTLAND	May 011 28 Feral cat	Cat	Adult 1-7	D	Male	Not Stated	Not Stated	Feces	17V14821-01.0006	6005	BAERMAN	No Lungworm larvae observed	No Lungworm larvae observed
2017-06-01 11:04:22	DHS Projects (DeBess)	OR	MULTNOMAH	PORTLAND	May 011 28 Feral cat	Cat	Adult 1-7	D	Male	Not Stated	Not Stated	Feces	17V14821-01.0006	10787	Fecal Sugar Centrifuge	No oocysts or eggs detected	No oocysts or eggs detected
2017-06-01 11:04:22	DHS Projects (DeBess)	OR	MULTNOMAH	PORTLAND	May 011 28 Feral cat	Cat	Adult 1-7	D	Male	Not Stated	Not Stated	Feces	17V14821-01.0006	10788	GIARDIA - FA Batch	Giardia - FA	Negative
2017-06-01 11:04:22	DHS Projects (DeBess)	OR	MULTNOMAH	PORTLAND	May 011 28 Feral cat	Cat	Adult 1-7	D	Male	Not Stated	Not Stated	Feces	17V14821-01.0006	10325	Crypto	No Cryptosporidia detected
2017-06-01 11:04:22	DHS Projects (DeBess)	OR	MULTNOMAH	PORTLAND	May 012 57 Feral cat	Cat	Adult 1-7	D	Male	Not Stated	Not Stated	Feces	17V14821-01.0007	6005	BAERMAN	No Lungworm larvae observed	No Lungworm larvae observed
2017-06-01 11:04:22	DHS Projects (DeBess)	OR	MULTNOMAH	PORTLAND	May 012 57 Feral cat	Cat	Adult 1-7	D	Male	Not Stated	Not Stated	Feces	17V14821-01.0007	10787	Fecal Sugar Centrifuge	Toxocara cati	Toxocara cati
2017-06-01 11:04:22	DHS Projects (DeBess)	OR	MULTNOMAH	PORTLAND	May 012 57 Feral cat	Cat	Adult 1-7	D	Male	Not Stated	Not Stated	Feces	17V14821-01.0007	10788	GIARDIA - FA Batch	Giardia - FA	Negative
2017-06-01 11:04:22	DHS Projects (DeBess)	OR	MULTNOMAH	PORTLAND	May 012 57 Feral cat	Cat	Adult 1-7	D	Male	Not Stated	Not Stated	Feces	17V14821-01.0007	10325	Crypto	Cryptosporidia present - Sm #
2017-06-01 11:04:22	DHS Projects (DeBess)	OR	MULTNOMAH	PORTLAND	May 013 3 Feral cat	Cat	Adult 1-7	D	Female	Not Stated	Not Stated	Feces	17V14821-01.0008	6005	BAERMAN	No Lungworm larvae observed	No Lungworm larvae observed
2017-06-01 11:04:22	DHS Projects (DeBess)	OR	MULTNOMAH	PORTLAND	May 013 3 Feral cat	Cat	Adult 1-7	D	Female	Not Stated	Not Stated	Feces	17V14821-01.0008	10787	Fecal Sugar Centrifuge	Taenia sp.	Taenia sp.
2017-06-01 11:04:22	DHS Projects (DeBess)	OR	MULTNOMAH	PORTLAND	May 013 3 Feral cat	Cat	Adult 1-7	D	Female	Not Stated	Not Stated	Feces	17V14821-01.0008	10788	GIARDIA - FA Batch	Giardia - FA	Negative
2017-06-01 11:04:22	DHS Projects (DeBess)	OR	MULTNOMAH	PORTLAND	May 013 3 Feral cat	Cat	Adult 1-7	D	Female	Not Stated	Not Stated	Feces	17V14821-01.0008	10325	Crypto	Cryptosporidia present - Sm #
2017-07-12 11:16:22	DHS Projects (DeBess)	OR	MULTNOMAH	PORTLAND	001 Gabrielle	Cat	13	Y	Female	Not Stated	Not Stated	Feces	18V00461-01.0001	6005	BAERMAN	No Lungworm larvae observed	No Lungworm larvae observed
2017-07-12 11:16:22	DHS Projects (DeBess)	OR	MULTNOMAH	PORTLAND	001 Gabrielle	Cat	13	Y	Female	Not Stated	Not Stated	Feces	18V00461-01.0001	10787	Fecal Sugar Centrifuge	No oocysts or eggs detected	No oocysts or eggs detected
2017-07-12 11:16:22	DHS Projects (DeBess)	OR	MULTNOMAH	PORTLAND	001 Gabrielle	Cat	13	Y	Female	Not Stated	Not Stated	Feces	18V00461-01.0001	10788	GIARDIA - FA Batch	Giardia - FA	Negative
2017-07-12 11:16:22	DHS Projects (DeBess)	OR	MULTNOMAH	PORTLAND	001 Gabrielle	Cat	13	Y	Female	Not Stated	Not Stated	Feces	18V00461-01.0001	10325	Crypto	No Cryptosporidia detected
2017-07-12 11:16:22	DHS Projects (DeBess)	OR	MULTNOMAH	PORTLAND	002 Klem	Cat	16	Y	Male	Not Stated	Not Stated	Feces	18V00461-01.0002	6005	BAERMAN	No Lungworm larvae observed	No Lungworm larvae observed
2017-07-12 11:16:22	DHS Projects (DeBess)	OR	MULTNOMAH	PORTLAND	002 Klem	Cat	16	Y	Male	Not Stated	Not Stated	Feces	18V00461-01.0002	10787	Fecal Sugar Centrifuge	No oocysts or eggs detected	No oocysts or eggs detected
2017-07-12 11:16:22	DHS Projects (DeBess)	OR	MULTNOMAH	PORTLAND	002 Klem	Cat	16	Y	Male	Not Stated	Not Stated	Feces	18V00461-01.0002	10788	GIARDIA - FA Batch	Giardia - FA	Negative
2017-07-12 11:16:22	DHS Projects (DeBess)	OR	MULTNOMAH	PORTLAND	002 Klem	Cat	16	Y	Male	Not Stated	Not Stated	Feces	18V00461-01.0002	10325	Crypto	No Cryptosporidia detected
2017-07-12 11:16:22	DHS Projects (DeBess)	OR	MULTNOMAH	PORTLAND	003 Smokers	Cat	6	Y	Male	Not Stated	Not Stated	Feces	18V00461-01.0003	6005	BAERMAN	No Lungworm larvae observed	No Lungworm larvae observed
2017-07-12 11:16:22	DHS Projects (DeBess)	OR	MULTNOMAH	PORTLAND	003 Smokers	Cat	6	Y	Male	Not Stated	Not Stated	Feces	18V00461-01.0003	10787	Fecal Sugar Centrifuge	No oocysts or eggs detected	No oocysts or eggs detected
2017-07-12 11:16:22	DHS Projects (DeBess)	OR	MULTNOMAH	PORTLAND	003 Smokers	Cat	6	Y	Male	Not Stated	Not Stated	Feces	18V00461-01.0003	10788	GIARDIA - FA Batch	Giardia - FA	Negative
2017-07-12 11:16:22	DHS Projects (DeBess)	OR	MULTNOMAH	PORTLAND	003 Smokers	Cat	6	Y	Male	Not Stated	Not Stated	Feces	18V00461-01.0003	10325	Crypto	No Cryptosporidia detected
2017-07-12 11:16:22	DHS Projects (DeBess)	OR	MULTNOMAH	PORTLAND	004 Lily	Cat	12	Y	Female	Not Stated	Not Stated	Feces	18V00461-01.0004	6005	BAERMAN	No Lungworm larvae observed	No Lungworm larvae observed
2017-07-12 11:16:22	DHS Projects (DeBess)	OR	MULTNOMAH	PORTLAND	004 Lily	Cat	12	Y	Female	Not Stated	Not Stated	Feces	18V00461-01.0004	10787	Fecal Sugar Centrifuge	No oocysts or eggs detected	No oocysts or eggs detected
2017-07-12 11:16:22	DHS Projects (DeBess)	OR	MULTNOMAH	PORTLAND	004 Lily	Cat	12	Y	Female	Not Stated	Not Stated	Feces	18V00461-01.0004	10788	GIARDIA - FA Batch	Giardia - FA	Negative
2017-07-12 11:16:22	DHS Projects (DeBess)	OR	MULTNOMAH	PORTLAND	004 Lily	Cat	12	Y	Female	Not Stated	Not Stated	Feces	18V00461-01.0004	10325	Crypto	No Cryptosporidia detected
2017-07-12 11:16:22	DHS Projects (DeBess)	OR	MULTNOMAH	PORTLAND	005 Beatrice	Cat	12	Y	Female	Not Stated	Not Stated	Feces	18V00461-01.0005	6005	BAERMAN	No Lungworm larvae observed	No Lungworm larvae observed
2017-07-12 11:16:22	DHS Projects (DeBess)	OR	MULTNOMAH	PORTLAND	005 Beatrice	Cat	12	Y	Female	Not Stated	Not Stated	Feces	18V00461-01.0005	10787	Fecal Sugar Centrifuge	No oocysts or eggs detected	No oocysts or eggs detected
2017-07-12 11:16:22	DHS Projects (DeBess)	OR	MULTNOMAH	PORTLAND	005 Beatrice	Cat	12	Y	Female	Not Stated	Not Stated	Feces	18V00461-01.0005	10788	GIARDIA - FA Batch	Giardia - FA	Negative
2017-07-12 11:16:22	DHS Projects (DeBess)	OR	MULTNOMAH	PORTLAND	005 Beatrice	Cat	12	Y	Female	Not Stated	Not Stated	Feces	18V00461-01.0005	10325	Crypto	No Cryptosporidia detected
2017-07-12 11:16:22	DHS Projects (DeBess)	OR	MULTNOMAH	PORTLAND	006 socks	Cat	15	Y	Male	Not Stated	Not Stated	Feces	18V00461-01.0006	6005	BAERMAN	No Lungworm larvae observed	No Lungworm larvae observed
2017-07-12 11:16:22	DHS Projects (DeBess)	OR	MULTNOMAH	PORTLAND	006 socks	Cat	15	Y	Male	Not Stated	Not Stated	Feces	18V00461-01.0006	10787	Fecal Sugar Centrifuge	No oocysts or eggs detected	No oocysts or eggs detected
2017-07-12 11:16:22	DHS Projects (DeBess)	OR	MULTNOMAH	PORTLAND	006 socks	Cat	15	Y	Male	Not Stated	Not Stated	Feces	18V00461-01.0006	10788	GIARDIA - FA Batch	Giardia - FA	Positive
2017-07-12 11:16:22	DHS Projects (DeBess)	OR	MULTNOMAH	PORTLAND	006 socks	Cat	15	Y	Male	Not Stated	Not Stated	Feces	18V00461-01.0006	10325	Crypto	No Cryptosporidia detected
2017-07-12 11:16:22	DHS Projects (DeBess)	OR	MULTNOMAH	PORTLAND	007 #10	Cat	2	M	Female	Not Stated	Not Stated	Feces	18V00461-01.0007	6005	BAERMAN	No Lungworm larvae observed	No Lungworm larvae observed
2017-07-12 11:16:22	DHS Projects (DeBess)	OR	MULTNOMAH	PORTLAND	007 #10	Cat	2	M	Female	Not Stated	Not Stated	Feces	18V00461-01.0007	10787	Fecal Sugar Centrifuge	Taenia sp.	Taenia sp.
2017-07-12 11:16:22	DHS Projects (DeBess)	OR	MULTNOMAH	PORTLAND	007 #10	Cat	2	M	Female	Not Stated	Not Stated	Feces	18V00461-01.0007	10788	GIARDIA - FA Batch	Giardia - FA	Negative
2017-07-12 11:16:22	DHS Projects (DeBess)	OR	MULTNOMAH	PORTLAND	007 #10	Cat	2	M	Female	Not Stated	Not Stated	Feces	18V00461-01.0007	10325	Crypto	No Cryptosporidia detected
2017-07-12 11:16:22	DHS Projects (DeBess)	OR	MULTNOMAH	PORTLAND	008 #12	Cat	1	Y	Female	Not Stated	Not Stated	Feces	18V00461-01.0008	6005	BAERMAN	No Lungworm larvae observed	No Lungworm larvae observed
2017-07-12 11:16:22	DHS Projects (DeBess)	OR	MULTNOMAH	PORTLAND	008 #12	Cat	1	Y	Female	Not Stated	Not Stated	Feces	18V00461-01.0008	10787	Fecal Sugar Centrifuge	Taenia sp.	Taenia sp.
2017-07-12 11:16:22	DHS Projects (DeBess)	OR	MULTNOMAH	PORTLAND	008 #12	Cat	1	Y	Female	Not Stated	Not Stated	Feces	18V00461-01.0008	10788	GIARDIA - FA Batch	Giardia - FA	Negative
2017-07-12 11:16:22	DHS Projects (DeBess)	OR	MULTNOMAH	PORTLAND	008 #12	Cat	1	Y	Female	Not Stated	Not Stated	Feces	18V00461-01.0008	10325	Crypto	Cryptosporidia present - Sm #
2017-07-12 11:16:22	DHS Projects (DeBess)	OR	MULTNOMAH	PORTLAND	009 #13	Cat	2.5	M	Male	Not Stated	Not Stated	Feces	18V00461-01.0009	6005	BAERMAN	No Lungworm larvae observed	No Lungworm larvae observed
2017-07-12 11:16:22	DHS Projects (DeBess)	OR	MULTNOMAH	PORTLAND	009 #13	Cat	2.5	M	Male	Not Stated	Not Stated	Feces	18V00461-01.0009	10787	Fecal Sugar Centrifuge	Toxocara cati	Toxocara cati
2017-07-12 11:16:22	DHS Projects (DeBess)	OR	MULTNOMAH	PORTLAND	009 #13	Cat	2.5	M	Male	Not Stated	Not Stated	Feces	18V00461-01.0009	10788	GIARDIA - FA Batch	Giardia - FA	Negative
2017-07-12 11:16:22	DHS Projects (DeBess)	OR	MULTNOMAH	PORTLAND	009 #13	Cat	2.5	M	Male	Not Stated	Not Stated	Feces	18V00461-01.0009	10325	Crypto	No Cryptosporidia detected
2017-07-12 11:16:22	DHS Projects (DeBess)	OR	MULTNOMAH	PORTLAND	010 #12	Cat	2.5	M	Female	Not Stated	Not Stated	Feces	18V00461-01.0010	6005	BAERMAN	No Lungworm larvae observed	No Lungworm larvae observed
2017-07-12 11:16:22	DHS Projects (DeBess)	OR	MULTNOMAH	PORTLAND	010 #12	Cat	2.5	M	Female	Not Stated	Not Stated	Feces	18V00461-01.0010	10787	Fecal Sugar Centrifuge	No oocysts or eggs detected	No oocysts or eggs detected
2017-07-12 11:16:22	DHS Projects (DeBess)	OR	MULTNOMAH	PORTLAND	010 #12	Cat	2.5	M	Female	Not Stated	Not Stated	Feces	18V00461-01.0010	10788	GIARDIA - FA Batch	Giardia - FA	Negative
2017-07-12 11:16:22	DHS Projects (DeBess)	OR	MULTNOMAH	PORTLAND	010 #12	Cat	2.5	M	Female	Not Stated	Not Stated	Feces	18V00461-01.0010	10325	Crypto	No Cryptosporidia detected
2017-07-12 11:16:22	DHS Projects (DeBess)	OR	MULTNOMAH	PORTLAND	011 #09	Cat	10.2	Y	Female	Not Stated	Not Stated	Feces	18V00461-01.0011	6005	BAERMAN	No Lungworm larvae observed	No Lungworm larvae observed
2017-07-12 11:16:22	DHS Projects (DeBess)	OR	MULTNOMAH	PORTLAND	011 #09	Cat	10.2	Y	Female	Not Stated	Not Stated	Feces	18V00461-01.0011	10787	Fecal Sugar Centrifuge	Toxocara cati	Toxocara cati
2017-07-12 11:16:22	DHS Projects (DeBess)	OR	MULTNOMAH	PORTLAND	011 #09	Cat	10.2	Y	Female	Not Stated	Not Stated	Feces	18V00461-01.0011	10788	GIARDIA - FA Batch	Giardia - FA	Negative
2017-07-12 11:16:22	DHS Projects (DeBess)	OR	MULTNOMAH	PORTLAND	011 #09	Cat	10.2	Y	Female	Not Stated	Not Stated	Feces	18V00461-01.0011	10325	Crypto	No Cryptosporidia detected
2017-07-12 11:16:22	DHS Projects (DeBess)	OR	MULTNOMAH	PORTLAND	012 #11	Cat	2.9	Y	Male	Not Stated	Not Stated	Feces	18V00461-01.0012	6005	BAERMAN	No Lungworm larvae observed	No Lungworm larvae observed
2017-07-12 11:16:22	DHS Projects (DeBess)	OR	MULTNOMAH	PORTLAND	012 #11	Cat	2.9	Y	Male	Not Stated	Not Stated	Feces	18V00461-01.0012	10787	Fecal Sugar Centrifuge	Toxocara cati	Toxocara cati
2017-07-12 11:16:22	DHS Projects (DeBess)	OR	MULTNOMAH	PORTLAND	012 #11	Cat	2.9	Y	Male	Not Stated	Not Stated	Feces	18V00461-01.0012	10788	GIARDIA - FA Batch	Giardia - FA	Negative
2017-07-12 11:16:22	DHS Projects (DeBess)	OR	MULTNOMAH	PORTLAND	012 #11	Cat	2.9	Y	Male	Not Stated	Not Stated	Feces	18V00461-01.0012	10325	Crypto	No Cryptosporidia detected
2017-07-12 11:16:22	DHS Projects (DeBess)	OR	MULTNOMAH	PORTLAND	013 #8	Cat	5	M	Female	Not Stated	Not Stated	Feces	18V00461-01.0013	6005	BAERMAN	Lungworm larvae present, Aelurostrongylus spp observed	Lungworm larvae present, Aelurostrongylus spp observed
2017-07-12 11:16:22	DHS Projects (DeBess)	OR	MULTNOMAH	PORTLAND	013 #8	Cat	5	M	Female	Not Stated	Not Stated	Feces	18V00461-01.0013	10787	Fecal Sugar Centrifuge	Toxocara cati	Toxocara cati
2017-07-12 11:16:22	DHS Projects (DeBess)	OR	MULTNOMAH	PORTLAND	013 #8	Cat	5	M	Female	Not Stated	Not Stated	Feces	18V00461-01.0013	10788	GIARDIA - FA Batch	Giardia - FA	Negative
2017-07-12 11:16:22	DHS Projects (DeBess)	OR	MULTNOMAH	PORTLAND	013 #8	Cat	5	M	Female	Not Stated	Not Stated	Feces	18V00461-01.0013	10325	Crypto	No Cryptosporidia detected
2017-07-12 11:16:22	DHS Projects (DeBess)	OR	MULTNOMAH	PORTLAND	014 #14	Cat	1	Y	Female	Not Stated	Not Stated	Feces	18V00461-01.0014	6005	BAERMAN	No Lungworm larvae observed	No Lungworm larvae observed
2017-07-12 11:16:22	DHS Projects (DeBess)	OR	MULTNOMAH	PORTLAND	014 #14	Cat	1	Y	Female	Not Stated	Not Stated	Feces	18V00461-01.0014	10787	Fecal Sugar Centrifuge	Toxocara cati	Toxocara cati
2017-07-12 11:16:22	DHS Projects (DeBess)	OR	MULTNOMAH	PORTLAND	014 #14	Cat	1	Y	Female	Not Stated	Not Stated	Feces	18V00461-01.0014	10788	GIARDIA - FA Batch	Giardia - FA	Negative
2017-07-12 11:16:22	DHS Projects (DeBess)	OR	MULTNOMAH	PORTLAND	014 #14	Cat	1	Y	Female	Not Stated	Not Stated	Feces	18V00461-01.0014	10325	Crypto	No Cryptosporidia detected
2017-07-12 11:16:22	DHS Projects (DeBess)	OR	MULTNOMAH	PORTLAND	015 #12	Cat	1	Y	Female	Not Stated	Not Stated	Feces	18V00461-01.0015	6005	BAERMAN	No Lungworm larvae observed	No Lungworm larvae observed
2017-07-12 11:16:22	DHS Projects (DeBess)	OR	MULTNOMAH	PORTLAND	015 #12	Cat	1	Y	Female	Not Stated	Not Stated	Feces	18V00461-01.0015	10787	Fecal Sugar Centrifuge	No oocysts or eggs detected	No oocysts or eggs detected
2017-07-12 11:16:22	DHS Projects (DeBess)	OR	MULTNOMAH	PORTLAND	015 #12	Cat	1	Y	Female	Not Stated	Not Stated	Feces	18V00461-01.0015	10788	GIARDIA - FA Batch	Giardia - FA	Positive
2017-07-12 11:16:22	DHS Projects (DeBess)	OR	MULTNOMAH	PORTLAND	015 #12	Cat	1	Y	Female	Not Stated	Not Stated	Feces	18V00461-01.0015	10325	Crypto	No Cryptosporidia detected
2017-08-01 10:59:56	DHS Projects (DeBess)	OR	MULTNOMAH	PORTLAND	Arnold #27	Cat	Not Stated	Not Stated	Not Stated	Not Stated	Not Stated	Feces	18V01503-01.0001	6005	BAERMAN	No Lungworm larvae observed	No Lungworm larvae observed
2017-08-01 10:59:56	DHS Projects (DeBess)	OR	MULTNOMAH	PORTLAND	Arnold #27	Cat	Not Stated	Not Stated	Not Stated	Not Stated	Not Stated	Feces	18V01503-01.0001	10787	Fecal Sugar Centrifuge	Toxocara cati	Toxocara cati
2017-08-01 10:59:56	DHS Projects (DeBess)	OR	MULTNOMAH	PORTLAND	Arnold #27	Cat	Not Stated	Not Stated	Not Stated	Not Stated	Not Stated	Feces	18V01503-01.0001	10787	Fecal Sugar Centrifuge	Taenia sp.	Taenia sp.
2017-08-01 10:59:56	DHS Projects (DeBess)	OR	MULTNOMAH	PORTLAND	Arnold #27	Cat	Not Stated	Not Stated	Not Stated	Not Stated	Not Stated	Feces	18V01503-01.0001	6014	CRYPTO	No Cryptosporidia detected	No Cryptosporidia detected
2017-08-01 10:59:56	DHS Projects (DeBess)	OR	MULTNOMAH	PORTLAND	Arnold #27	Cat	Not Stated	Not Stated	Not Stated	Not Stated	Not Stated	Feces	18V01503-01.0001	10983	Giardia - FA	No Giardia detected	No Giardia detected
2017-08-01 10:59:56	DHS Projects (DeBess)	OR	MULTNOMAH	PORTLAND	Hutchinson #3	Cat	Not Stated	Not Stated	Not Stated	Not Stated	Not Stated	Feces	18V01503-01.0002	6005	BAERMAN	Lungworm larvae present, Aelurostrongylus spp observed	Lungworm larvae present, Aelurostrongylus spp observed
2017-08-01 10:59:56	DHS Projects (DeBess)	OR	MULTNOMAH	PORTLAND	Hutchinson #3	Cat	Not Stated	Not Stated	Not Stated	Not Stated	Not Stated	Feces	18V01503-01.0002	10787	Fecal Sugar Centrifuge	No oocysts or eggs detected	No oocysts or eggs detected
2017-08-01 10:59:56	DHS Projects (DeBess)	OR	MULTNOMAH	PORTLAND	Hutchinson #3	Cat	Not Stated	Not Stated	Not Stated	Not Stated	Not Stated	Feces	18V01503-01.0002	6014	CRYPTO	No Cryptosporidia detected	No Cryptosporidia detected
2017-08-01 10:59:56	DHS Projects (DeBess)	OR	MULTNOMAH	PORTLAND	Hutchinson #3	Cat	Not Stated	Not Stated	Not Stated	Not Stated	Not Stated	Feces	18V01503-01.0002	10983	Giardia - FA	No Giardia detected	No Giardia detected
2017-08-01 10:59:56	DHS Projects (DeBess)	OR	MULTNOMAH	PORTLAND	Gleason #25	Cat	Not Stated	Not Stated	Not Stated	Not Stated	Not Stated	Feces	18V01503-01.0003	6005	BAERMAN	No Lungworm larvae observed	No Lungworm larvae observed
2017-08-01 10:59:56	DHS Projects (DeBess)	OR	MULTNOMAH	PORTLAND	Gleason #25	Cat	Not Stated	Not Stated	Not Stated	Not Stated	Not Stated	Feces	18V01503-01.0003	10787	Fecal Sugar Centrifuge	Toxocara cati	Toxocara cati
2017-08-01 10:59:56	DHS Projects (DeBess)	OR	MULTNOMAH	PORTLAND	Gleason #25	Cat	Not Stated	Not Stated	Not Stated	Not Stated	Not Stated	Feces	18V01503-01.0003	10787	Fecal Sugar Centrifuge	Isospora	Isospora
2017-08-01 10:59:56	DHS Projects (DeBess)	OR	MULTNOMAH	PORTLAND	Gleason #25	Cat	Not Stated	Not Stated	Not Stated	Not Stated	Not Stated	Feces	18V01503-01.0003	6014	CRYPTO	No Cryptosporidia detected	No Cryptosporidia detected
2017-08-01 10:59:56	DHS Projects (DeBess)	OR	MULTNOMAH	PORTLAND	Gleason #25	Cat	Not Stated	Not Stated	Not Stated	Not Stated	Not Stated	Feces	18V01503-01.0003	10983	Giardia - FA	Giardia Present	Giardia Present
2017-08-01 10:59:56	DHS Projects (DeBess)	OR	MULTNOMAH	PORTLAND	Fackwell #20	Cat	Not Stated	Not Stated	Not Stated	Not Stated	Not Stated	Feces	18V01503-01.0004	6005	BAERMAN	No Lungworm larvae observed	No Lungworm larvae observed
2017-08-01 10:59:56	DHS Projects (DeBess)	OR	MULTNOMAH	PORTLAND	Fackwell #20	Cat	Not Stated	Not Stated	Not Stated	Not Stated	Not Stated	Feces	18V01503-01.0004	10787	Fecal Sugar Centrifuge	No oocysts or eggs detected	No oocysts or eggs detected
2017-08-01 10:59:56	DHS Projects (DeBess)	OR	MULTNOMAH	PORTLAND	Fackwell #20	Cat	Not Stated	Not Stated	Not Stated	Not Stated	Not Stated	Feces	18V01503-01.0004	6014	CRYPTO	No Cryptosporidia detected	No Cryptosporidia detected
2017-08-01 10:59:56	DHS Projects (DeBess)	OR	MULTNOMAH	PORTLAND	Fackwell #20	Cat	Not Stated	Not Stated	Not Stated	Not Stated	Not Stated	Feces	18V01503-01.0004	10983	Giardia - FA	No Giardia detected	No Giardia detected
2017-08-01 10:59:56	DHS Projects (DeBess)	OR	MULTNOMAH	PORTLAND	Arnold #32	Cat	Not Stated	Not Stated	Not Stated	Not Stated	Not Stated	Feces	18V01503-01.0005	6005	BAERMAN	Lungworm larvae present, Aelurostrongylus spp observed	Lungworm larvae present, Aelurostrongylus spp observed
2017-08-01 10:59:56	DHS Projects (DeBess)	OR	MULTNOMAH	PORTLAND	Arnold #32	Cat	Not Stated	Not Stated	Not Stated	Not Stated	Not Stated	Feces	18V01503-01.0005	10787	Fecal Sugar Centrifuge	Toxocara cati	Toxocara cati
2017-08-01 10:59:56	DHS Projects (DeBess)	OR	MULTNOMAH	PORTLAND	Arnold #32	Cat	Not Stated	Not Stated	Not Stated	Not Stated	Not Stated	Feces	18V01503-01.0005	6014	CRYPTO	No Cryptosporidia detected	No Cryptosporidia detected
2017-08-01 10:59:56	DHS Projects (DeBess)	OR	MULTNOMAH	PORTLAND	Arnold #32	Cat	Not Stated	Not Stated	Not Stated	Not Stated	Not Stated	Feces	18V01503-01.0005	10983	Giardia - FA	No Giardia detected	No Giardia detected
2017-08-01 10:59:56	DHS Projects (DeBess)	OR	MULTNOMAH	PORTLAND	Dixon #18	Cat	Not Stated	Not Stated	Not Stated	Not Stated	Not Stated	Feces	18V01503-01.0006	6005	BAERMAN	No Lungworm larvae observed	No Lungworm larvae observed
2017-08-01 10:59:56	DHS Projects (DeBess)	OR	MULTNOMAH	PORTLAND	Dixon #18	Cat	Not Stated	Not Stated	Not Stated	Not Stated	Not Stated	Feces	18V01503-01.0006	10787	Fecal Sugar Centrifuge	No oocysts or eggs detected	No oocysts or eggs detected
2017-08-01 10:59:56	DHS Projects (DeBess)	OR	MULTNOMAH	PORTLAND	Dixon #18	Cat	Not Stated	Not Stated	Not Stated	Not Stated	Not Stated	Feces	18V01503-01.0006	6014	CRYPTO	No Cryptosporidia detected	No Cryptosporidia detected
2017-08-01 10:59:56	DHS Projects (DeBess)	OR	MULTNOMAH	PORTLAND	Dixon #18	Cat	Not Stated	Not Stated	Not Stated	Not Stated	Not Stated	Feces	18V01503-01.0006	10983	Giardia - FA	No Giardia detected	No Giardia detected
2017-08-18 12:52:21	DHS Projects (DeBess)	OR	MULTNOMAH	PORTLAND	080417-16 Rogers	Cat	Not Stated	Not Stated	Not Stated	Not Stated	Not Stated	Feces	18V02405-01.0001	6005	BAERMAN	No Lungworm larvae observed	No Lungworm larvae observed
2017-08-18 12:52:21	DHS Projects (DeBess)	OR	MULTNOMAH	PORTLAND	080417-16 Rogers	Cat	Not Stated	Not Stated	Not Stated	Not Stated	Not Stated	Feces	18V02405-01.0001	10787	Fecal Sugar Centrifuge	No oocysts or eggs detected	No oocysts or eggs detected
2017-08-18 12:52:21	DHS Projects (DeBess)	OR	MULTNOMAH	PORTLAND	080417-16 Rogers	Cat	Not Stated	Not Stated	Not Stated	Not Stated	Not Stated	Feces	18V02405-01.0001	6014	CRYPTO	Cryptosporidia present	Cryptosporidia present
2017-08-18 12:52:21	DHS Projects (DeBess)	OR	MULTNOMAH	PORTLAND	080417-16 Rogers	Cat	Not Stated	Not Stated	Not Stated	Not Stated	Not Stated	Feces	18V02405-01.0001	10983	Giardia - FA	Giardia Present	Giardia Present Large numbers of cysts observed.
2017-08-18 12:52:21	DHS Projects (DeBess)	OR	MULTNOMAH	PORTLAND	087017-31 Anderson	Cat	Not Stated	Not Stated	Not Stated	Not Stated	Not Stated	Feces	18V02405-01.0002	6005	BAERMAN	No Lungworm larvae observed	No Lungworm larvae observed
2017-08-18 12:52:21	DHS Projects (DeBess)	OR	MULTNOMAH	PORTLAND	087017-31 Anderson	Cat	Not Stated	Not Stated	Not Stated	Not Stated	Not Stated	Feces	18V02405-01.0002	10787	Fecal Sugar Centrifuge	No oocysts or eggs detected	No oocysts or eggs detected
2017-08-18 12:52:21	DHS Projects (DeBess)	OR	MULTNOMAH	PORTLAND	087017-31 Anderson	Cat	Not Stated	Not Stated	Not Stated	Not Stated	Not Stated	Feces	18V02405-01.0002	6014	CRYPTO	Cryptosporidia present	Cryptosporidia present
2017-08-18 12:52:21	DHS Projects (DeBess)	OR	MULTNOMAH	PORTLAND	087017-31 Anderson	Cat	Not Stated	Not Stated	Not Stated	Not Stated	Not Stated	Feces	18V02405-01.0002	10983	Giardia - FA	Giardia Present	Giardia Present
2017-08-18 12:52:21	DHS Projects (DeBess)	OR	MULTNOMAH	PORTLAND	081117-8 Ley	Cat	Not Stated	Not Stated	Not Stated	Not Stated	Not Stated	Feces	18V02405-01.0003	6005	BAERMAN	No Lungworm larvae observed	No Lungworm larvae observed
2017-08-18 12:52:21	DHS Projects (DeBess)	OR	MULTNOMAH	PORTLAND	081117-8 Ley	Cat	Not Stated	Not Stated	Not Stated	Not Stated	Not Stated	Feces	18V02405-01.0003	10787	Fecal Sugar Centrifuge	Taenia sp.	Taenia sp.
2017-08-18 12:52:21	DHS Projects (DeBess)	OR	MULTNOMAH	PORTLAND	081117-8 Ley	Cat	Not Stated	Not Stated	Not Stated	Not Stated	Not Stated	Feces	18V02405-01.0003	10787	Fecal Sugar Centrifuge	Toxocara cati	Toxocara cati
2017-08-18 12:52:21	DHS Projects (DeBess)	OR	MULTNOMAH	PORTLAND	081117-8 Ley	Cat	Not Stated	Not Stated	Not Stated	Not Stated	Not Stated	Feces	18V02405-01.0003	6014	CRYPTO	Cryptosporidia present	Cryptosporidia present
2017-08-18 12:52:21	DHS Projects (DeBess)	OR	MULTNOMAH	PORTLAND	081117-8 Ley	Cat	Not Stated	Not Stated	Not Stated	Not Stated	Not Stated	Feces	18V02405-01.0003	10983	Giardia - FA	Giardia Present	Giardia Present
2017-08-18 12:52:21	DHS Projects (DeBess)	OR	MULTNOMAH	PORTLAND	080871-10 Moore	Cat	Not Stated	Not Stated	Not Stated	Not Stated	Not Stated	Feces	18V02405-01.0004	6005	BAERMAN	No Lungworm larvae observed	No Lungworm larvae observed
2017-08-18 12:52:21	DHS Projects (DeBess)	OR	MULTNOMAH	PORTLAND	080871-10 Moore	Cat	Not Stated	Not Stated	Not Stated	Not Stated	Not Stated	Feces	18V02405-01.0004	10787	Fecal Sugar Centrifuge	Toxocara cati	Toxocara cati
2017-08-18 12:52:21	DHS Projects (DeBess)	OR	MULTNOMAH	PORTLAND	080871-10 Moore	Cat	Not Stated	Not Stated	Not Stated	Not Stated	Not Stated	Feces	18V02405-01.0004	6014	CRYPTO	No Cryptosporidia detected	No Cryptosporidia detected
2017-08-18 12:52:21	DHS Projects (DeBess)	OR	MULTNOMAH	PORTLAND	080871-10 Moore	Cat	Not Stated	Not Stated	Not Stated	Not Stated	Not Stated	Feces	18V02405-01.0004	10983	Giardia - FA	No Giardia detected	No Giardia detected
2017-08-18 12:52:21	DHS Projects (DeBess)	OR	MULTNOMAH	PORTLAND	080417-12 Rogers	Cat	Not Stated	Not Stated	Not Stated	Not Stated	Not Stated	Feces	18V02405-01.0005	6005	BAERMAN	No Lungworm larvae observed	No Lungworm larvae observed
2017-08-18 12:52:21	DHS Projects (DeBess)	OR	MULTNOMAH	PORTLAND	080417-12 Rogers	Cat	Not Stated	Not Stated	Not Stated	Not Stated	Not Stated	Feces	18V02405-01.0005	10787	Fecal Sugar Centrifuge	Toxocara cati	Toxocara cati
2017-08-18 12:52:21	DHS Projects (DeBess)	OR	MULTNOMAH	PORTLAND	080417-12 Rogers	Cat	Not Stated	Not Stated	Not Stated	Not Stated	Not Stated	Feces	18V02405-01.0005	6014	CRYPTO	No Cryptosporidia detected	No Cryptosporidia detected
2017-08-18 12:52:21	DHS Projects (DeBess)	OR	MULTNOMAH	PORTLAND	080417-12 Rogers	Cat	Not Stated	Not Stated	Not Stated	Not Stated	Not Stated	Feces	18V02405-01.0005	10983	Giardia - FA	Giardia Present	Giardia Present Large numbers of cysts observed.
2017-08-18 12:52:21	DHS Projects (DeBess)	OR	MULTNOMAH	PORTLAND	081017-32 Anderson	Cat	Not Stated	Not Stated	Not Stated	Not Stated	Not Stated	Feces	18V02405-01.0006	6005	BAERMAN	No Lungworm larvae observed	No Lungworm larvae observed
2017-08-18 12:52:21	DHS Projects (DeBess)	OR	MULTNOMAH	PORTLAND	081017-32 Anderson	Cat	Not Stated	Not Stated	Not Stated	Not Stated	Not Stated	Feces	18V02405-01.0006	10787	Fecal Sugar Centrifuge	Trichuris	Trichuris
2017-08-18 12:52:21	DHS Projects (DeBess)	OR	MULTNOMAH	PORTLAND	081017-32 Anderson	Cat	Not Stated	Not Stated	Not Stated	Not Stated	Not Stated	Feces	18V02405-01.0006	6014	CRYPTO	No Cryptosporidia detected	No Cryptosporidia detected
2017-08-18 12:52:21	DHS Projects (DeBess)	OR	MULTNOMAH	PORTLAND	081017-32 Anderson	Cat	Not Stated	Not Stated	Not Stated	Not Stated	Not Stated	Feces	18V02405-01.0006	10983	Giardia - FA	Giardia Present	Giardia Present Large numbers of cysts observed.
2017-08-18 12:52:21	DHS Projects (DeBess)	OR	MULTNOMAH	PORTLAND	081017-01 Arrant	Cat	Not Stated	Not Stated	Not Stated	Not Stated	Not Stated	Feces	18V02405-01.0007	6005	BAERMAN	No Lungworm larvae observed	No Lungworm larvae observed
2017-08-18 12:52:21	DHS Projects (DeBess)	OR	MULTNOMAH	PORTLAND	081017-01 Arrant	Cat	Not Stated	Not Stated	Not Stated	Not Stated	Not Stated	Feces	18V02405-01.0007	10787	Fecal Sugar Centrifuge	No oocysts or eggs detected	No oocysts or eggs detected
2017-08-18 12:52:21	DHS Projects (DeBess)	OR	MULTNOMAH	PORTLAND	081017-01 Arrant	Cat	Not Stated	Not Stated	Not Stated	Not Stated	Not Stated	Feces	18V02405-01.0007	6014	CRYPTO	Cryptosporidia present	Cryptosporidia present
2017-08-18 12:52:21	DHS Projects (DeBess)	OR	MULTNOMAH	PORTLAND	081017-01 Arrant	Cat	Not Stated	Not Stated	Not Stated	Not Stated	Not Stated	Feces	18V02405-01.0007	10983	Giardia - FA	Giardia Present	Giardia Present Large numbers of cysts observed.
2017-08-29 10:45:01	DHS Projects (DeBess)	OR	MULTNOMAH	PORTLAND	August 008 Georgie, G. Lombard	Cat	3	M	Male	Not Stated	Not Stated	Feces	18V02898-01.0001	6005	BAERMAN	Lungworm larvae present, Aelurostrongylus spp observed	Lungworm larvae present, Aelurostrongylus spp observed
2017-08-29 10:45:01	DHS Projects (DeBess)	OR	MULTNOMAH	PORTLAND	August 008 Georgie, G. Lombard	Cat	3	M	Male	Not Stated	Not Stated	Feces	18V02898-01.0001	10787	Fecal Sugar Centrifuge	Toxocara cati	Toxocara cati
2017-08-29 10:45:01	DHS Projects (DeBess)	OR	MULTNOMAH	PORTLAND	August 008 Georgie, G. Lombard	Cat	3	M	Male	Not Stated	Not Stated	Feces	18V02898-01.0001	6014	CRYPTO	No Cryptosporidia detected	No Cryptosporidia detected
2017-08-29 10:45:01	DHS Projects (DeBess)	OR	MULTNOMAH	PORTLAND	August 008 Georgie, G. Lombard	Cat	3	M	Male	Not Stated	Not Stated	Feces	18V02898-01.0001	10983	Giardia - FA	No Giardia detected	No Giardia detected
2017-08-29 10:45:01	DHS Projects (DeBess)	OR	MULTNOMAH	PORTLAND	August 009 Catalina, N Hillsdale	Cat	10	Y	Female	Not Stated	Not Stated	Feces	18V02898-01.0002	6005	BAERMAN	Lungworm larvae present, Aelurostrongylus spp observed	Lungworm larvae present, Aelurostrongylus spp observed
2017-08-29 10:45:01	DHS Projects (DeBess)	OR	MULTNOMAH	PORTLAND	August 009 Catalina, N Hillsdale	Cat	10	Y	Female	Not Stated	Not Stated	Feces	18V02898-01.0002	10787	Fecal Sugar Centrifuge	No oocysts or eggs detected	No oocysts or eggs detected
2017-08-29 10:45:01	DHS Projects (DeBess)	OR	MULTNOMAH	PORTLAND	August 009 Catalina, N Hillsdale	Cat	10	Y	Female	Not Stated	Not Stated	Feces	18V02898-01.0002	6014	CRYPTO	No Cryptosporidia detected	No Cryptosporidia detected
2017-08-29 10:45:01	DHS Projects (DeBess)	OR	MULTNOMAH	PORTLAND	August 009 Catalina, N Hillsdale	Cat	10	Y	Female	Not Stated	Not Stated	Feces	18V02898-01.0002	10983	Giardia - FA	No Giardia detected	No Giardia detected
2017-08-29 10:45:01	DHS Projects (DeBess)	OR	MULTNOMAH	PORTLAND	August 010 Kismet, W-Hillsdale	Cat	1.5	Y	Male	Not Stated	Not Stated	Feces	18V02898-01.0003	6005	BAERMAN	Lungworm larvae present, Aelurostrongylus spp observed	Lungworm larvae present, Aelurostrongylus spp observed
2017-08-29 10:45:01	DHS Projects (DeBess)	OR	MULTNOMAH	PORTLAND	August 010 Kismet, W-Hillsdale	Cat	1.5	Y	Male	Not Stated	Not Stated	Feces	18V02898-01.0003	10787	Fecal Sugar Centrifuge	No oocysts or eggs detected	No oocysts or eggs detected
2017-08-29 10:45:01	DHS Projects (DeBess)	OR	MULTNOMAH	PORTLAND	August 010 Kismet, W-Hillsdale	Cat	1.5	Y	Male	Not Stated	Not Stated	Feces	18V02898-01.0003	6014	CRYPTO	No Cryptosporidia detected	No Cryptosporidia detected
2017-08-29 10:45:01	DHS Projects (DeBess)	OR	MULTNOMAH	PORTLAND	August 010 Kismet, W-Hillsdale	Cat	1.5	Y	Male	Not Stated	Not Stated	Feces	18V02898-01.0003	10983	Giardia - FA	No Giardia detected	No Giardia detected
2017-08-29 10:45:01	DHS Projects (DeBess)	OR	MULTNOMAH	PORTLAND	August 011 Maverick, Sa_Hillsdale	Cat	9	Y	Female	Not Stated	Not Stated	Feces	18V02898-01.0004	6005	BAERMAN	No Lungworm larvae observed	No Lungworm larvae observed
2017-08-29 10:45:01	DHS Projects (DeBess)	OR	MULTNOMAH	PORTLAND	August 011 Maverick, Sa_Hillsdale	Cat	9	Y	Female	Not Stated	Not Stated	Feces	18V02898-01.0004	10787	Fecal Sugar Centrifuge	No oocysts or eggs detected	No oocysts or eggs detected
2017-08-29 10:45:01	DHS Projects (DeBess)	OR	MULTNOMAH	PORTLAND	August 011 Maverick, Sa_Hillsdale	Cat	9	Y	Female	Not Stated	Not Stated	Feces	18V02898-01.0004	6014	CRYPTO	Cryptosporidia present	Cryptosporidia present
2017-08-29 10:45:01	DHS Projects (DeBess)	OR	MULTNOMAH	PORTLAND	August 011 Maverick, Sa_Hillsdale	Cat	9	Y	Female	Not Stated	Not Stated	Feces	18V02898-01.0004	10983	Giardia - FA	No Giardia detected	No Giardia detected
2017-08-29 10:45:01	DHS Projects (DeBess)	OR	MULTNOMAH	PORTLAND	August 012 Cassidy, Sandra-Hillsdale	Cat	9	Y	Female	Not Stated	Not Stated	Feces	18V02898-01.0005	6005	BAERMAN	Lungworm larvae present, Aelurostrongylus spp observed	Lungworm larvae present, Aelurostrongylus spp observed
2017-08-29 10:45:01	DHS Projects (DeBess)	OR	MULTNOMAH	PORTLAND	August 012 Cassidy, Sandra-Hillsdale	Cat	9	Y	Female	Not Stated	Not Stated	Feces	18V02898-01.0005	10787	Fecal Sugar Centrifuge	No oocysts or eggs detected	No oocysts or eggs detected
2017-08-29 10:45:01	DHS Projects (DeBess)	OR	MULTNOMAH	PORTLAND	August 012 Cassidy, Sandra-Hillsdale	Cat	9	Y	Female	Not Stated	Not Stated	Feces	18V02898-01.0005	6014	CRYPTO	No Cryptosporidia detected	No Cryptosporidia detected
2017-08-29 10:45:01	DHS Projects (DeBess)	OR	MULTNOMAH	PORTLAND	August 012 Cassidy, Sandra-Hillsdale	Cat	9	Y	Female	Not Stated	Not Stated	Feces	18V02898-01.0005	10983	Giardia - FA	No Giardia detected	No Giardia detected
2017-08-29 10:45:01	DHS Projects (DeBess)	OR	MULTNOMAH	PORTLAND	August 013 Kitty, M-Hillsdale	Cat	8	Y	Female	Not Stated	Not Stated	Feces	18V02898-01.0006	6005	BAERMAN	No Lungworm larvae observed	No Lungworm larvae observed
2017-08-29 10:45:01	DHS Projects (DeBess)	OR	MULTNOMAH	PORTLAND	August 013 Kitty, M-Hillsdale	Cat	8	Y	Female	Not Stated	Not Stated	Feces	18V02898-01.0006	10787	Fecal Sugar Centrifuge	No oocysts or eggs detected	No oocysts or eggs detected
2017-08-29 10:45:01	DHS Projects (DeBess)	OR	MULTNOMAH	PORTLAND	August 013 Kitty, M-Hillsdale	Cat	8	Y	Female	Not Stated	Not Stated	Feces	18V02898-01.0006	6014	CRYPTO	No Cryptosporidia detected	No Cryptosporidia detected
2017-08-29 10:45:01	DHS Projects (DeBess)	OR	MULTNOMAH	PORTLAND	August 013 Kitty, M-Hillsdale	Cat	8	Y	Female	Not Stated	Not Stated	Feces	18V02898-01.0006	10983	Giardia - FA	No Giardia detected	No Giardia detected
